# Supplementary material
Source: PubMed Central journal article supplement (PMC3107595)

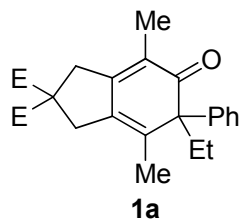

<sup>1</sup>H NMR (in CDCl<sub>3</sub>)

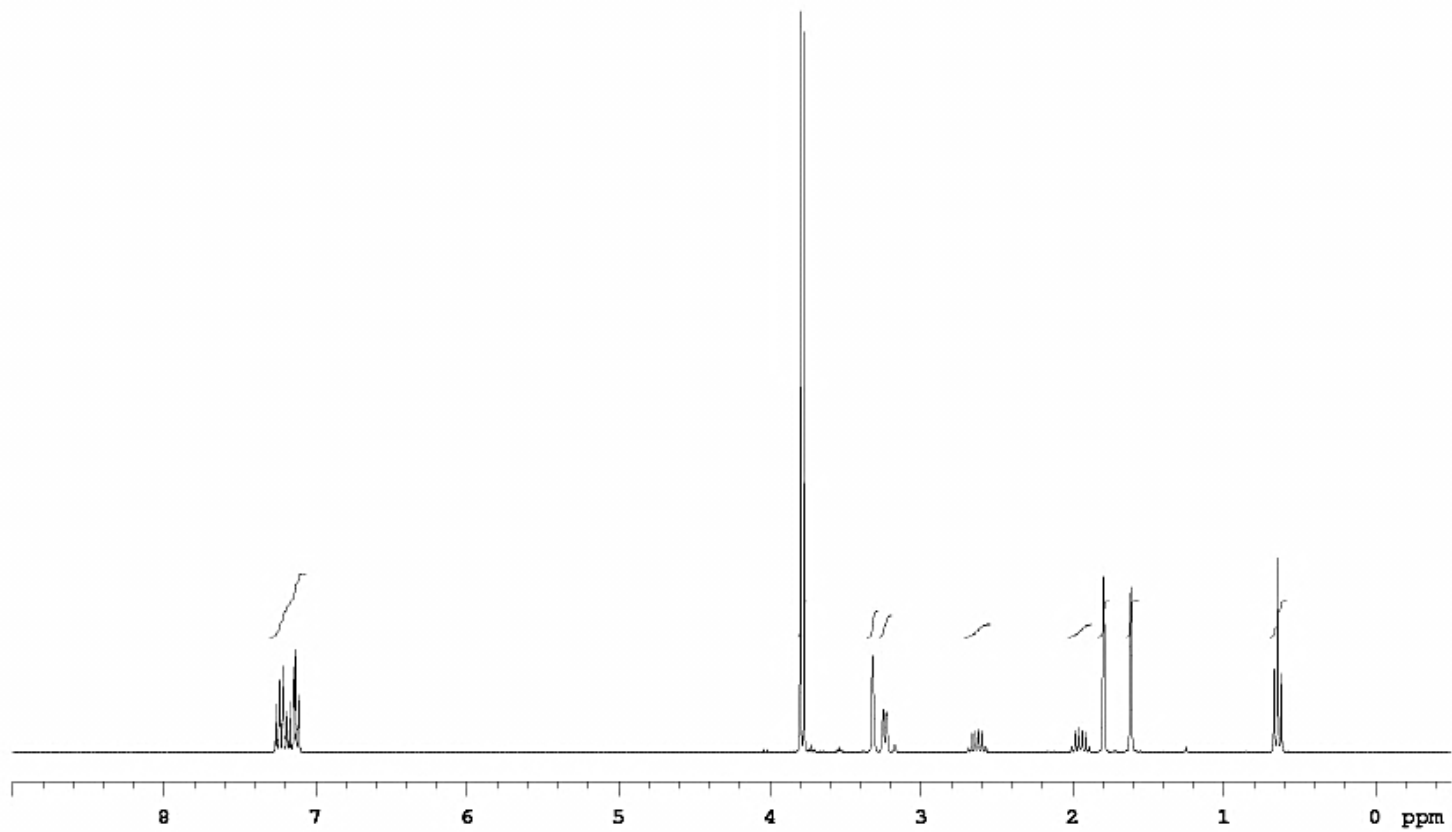

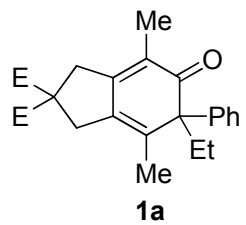

<sup>13</sup>C NMR (in CDCl<sub>3</sub>)

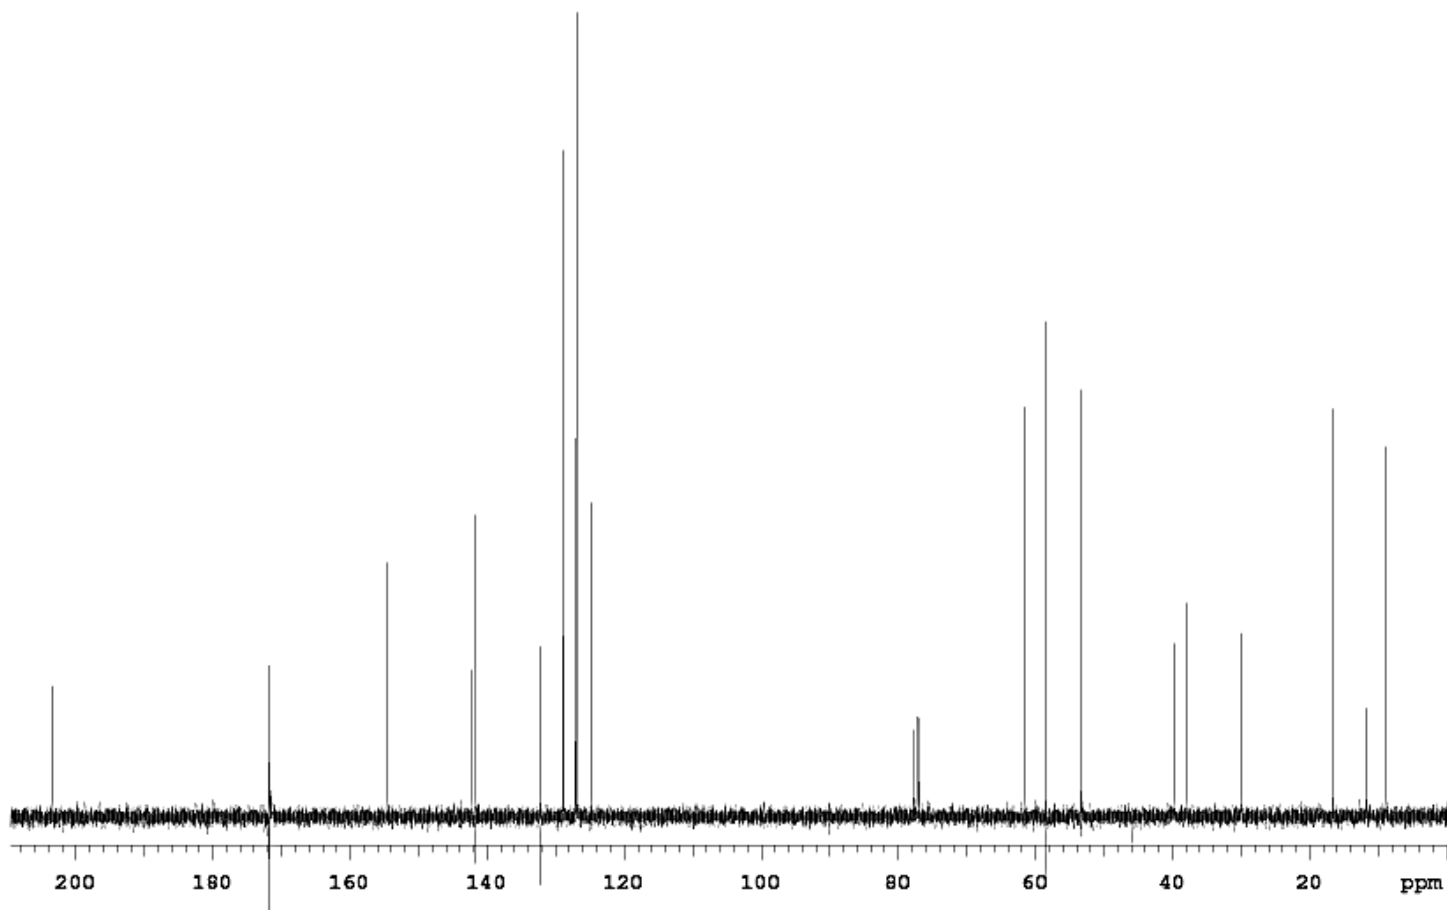

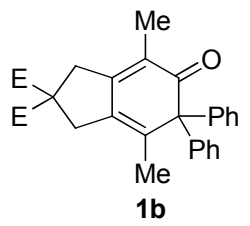

<sup>1</sup>H NMR (in CDCl<sub>3</sub>)

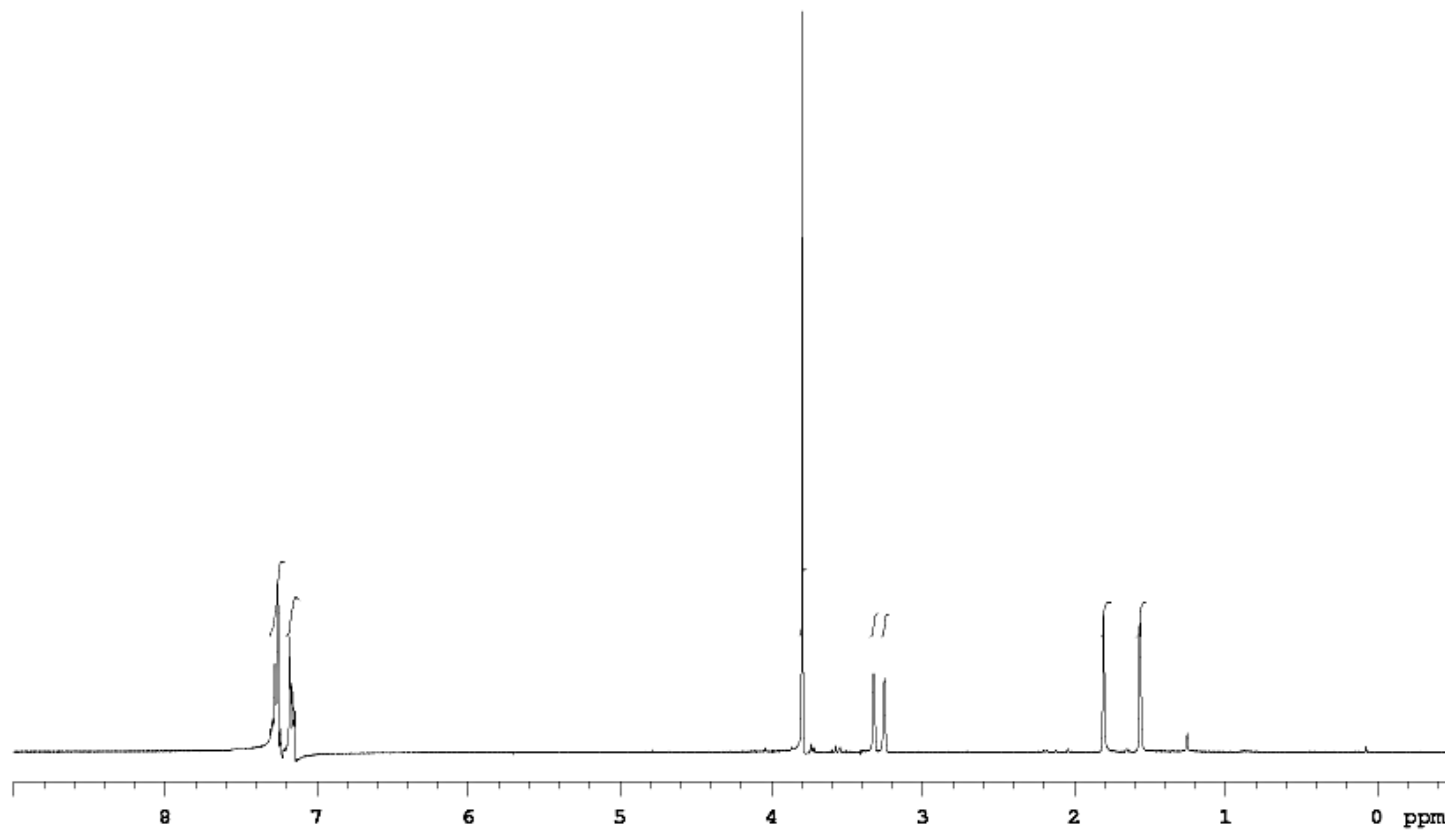

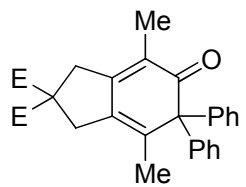

**1b**  
 $^{13}\text{C}$  NMR (in  $\text{CDCl}_3$ )

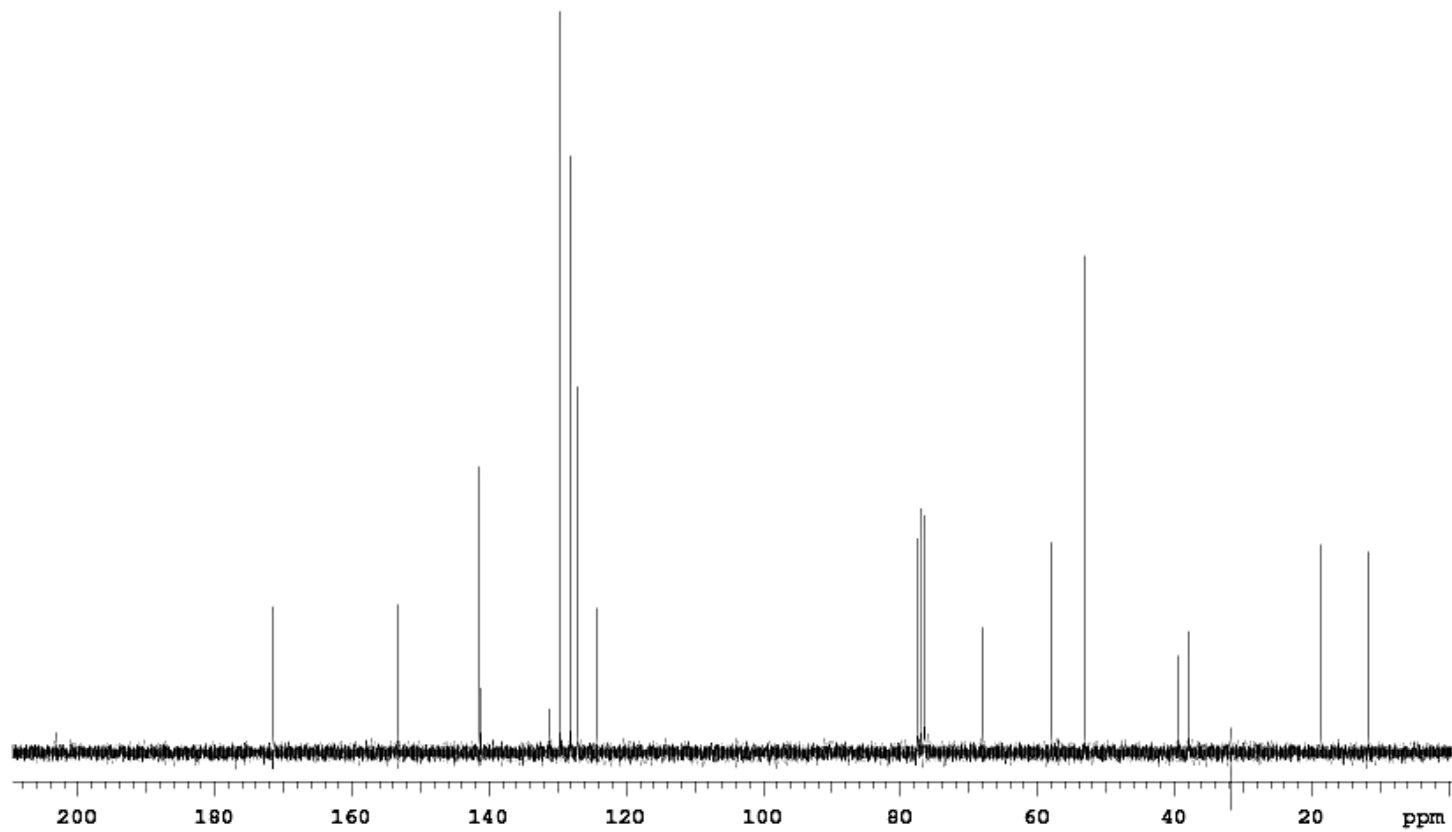

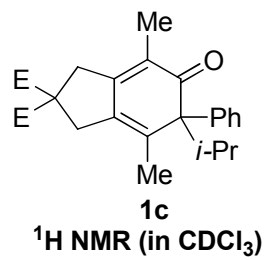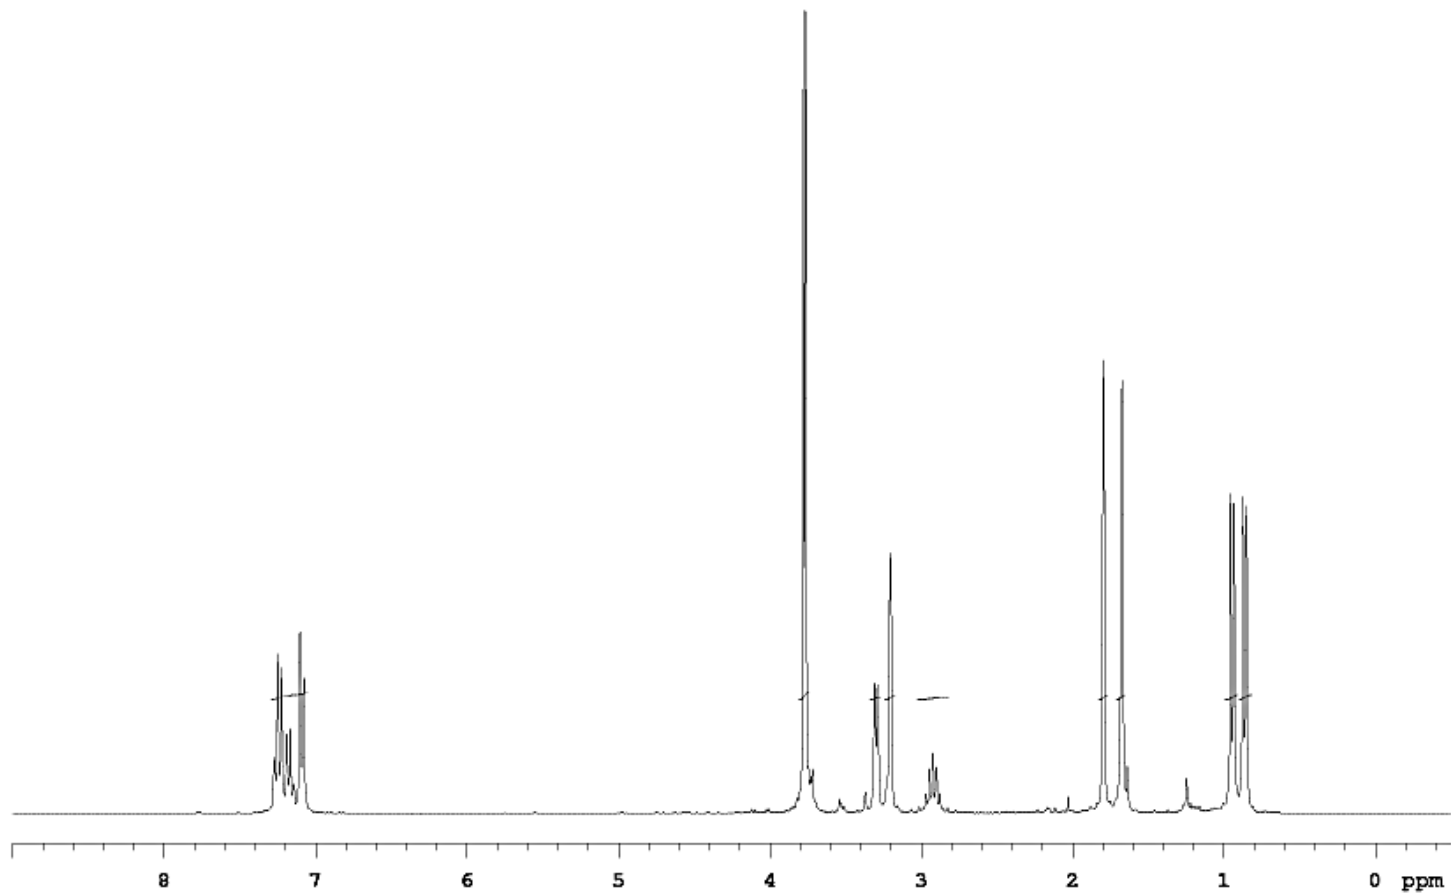

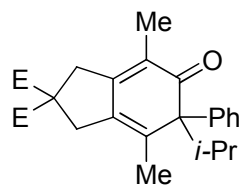

**1c**  
<sup>13</sup>C NMR (in CDCl<sub>3</sub>)

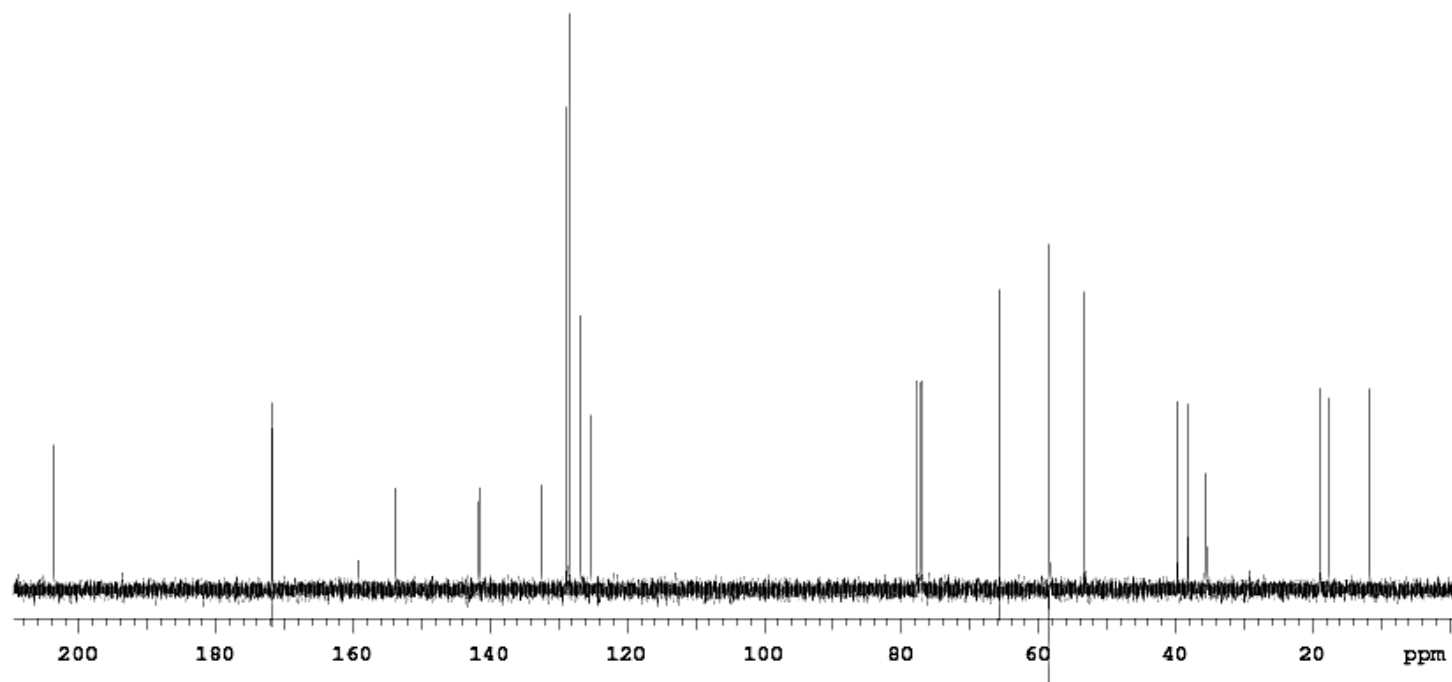

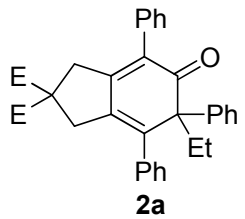

$^1\text{H NMR}$  (in  $\text{CDCl}_3$ )

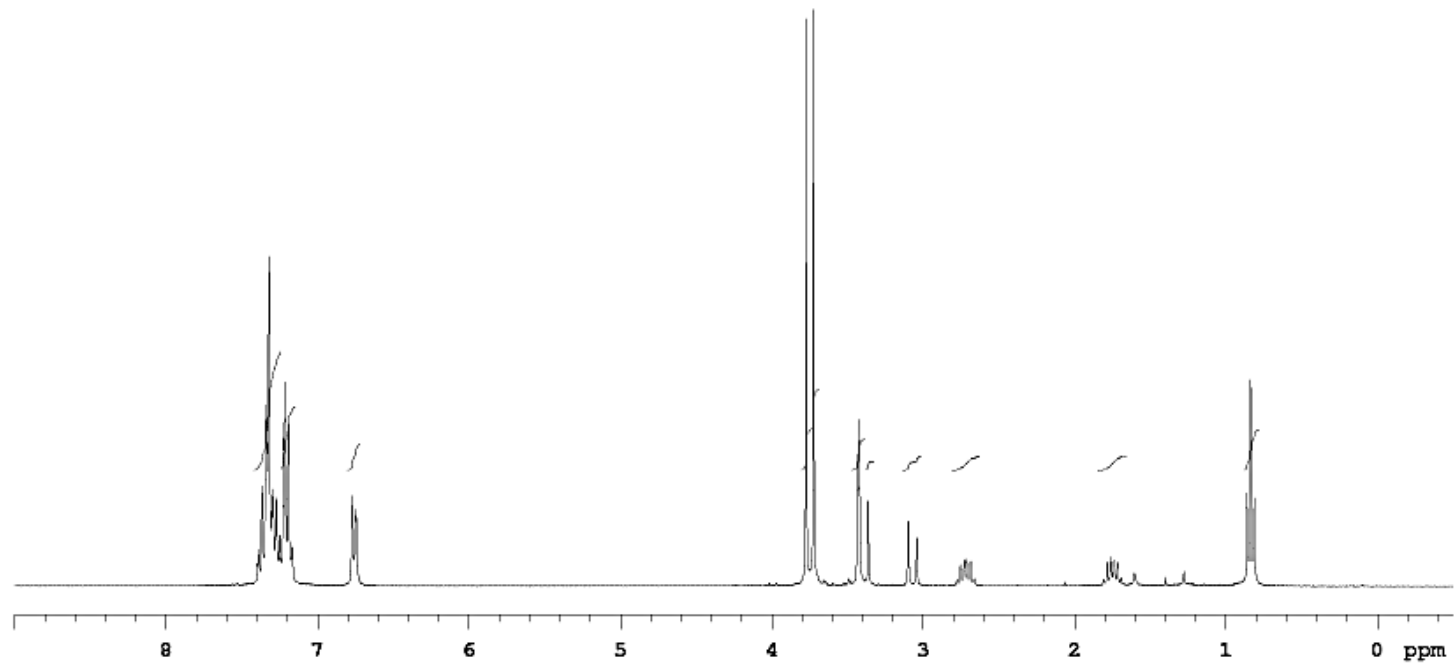

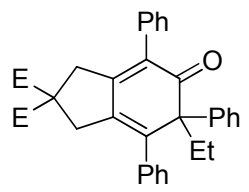

**2a**  
<sup>13</sup>C NMR (in CDCl<sub>3</sub>)

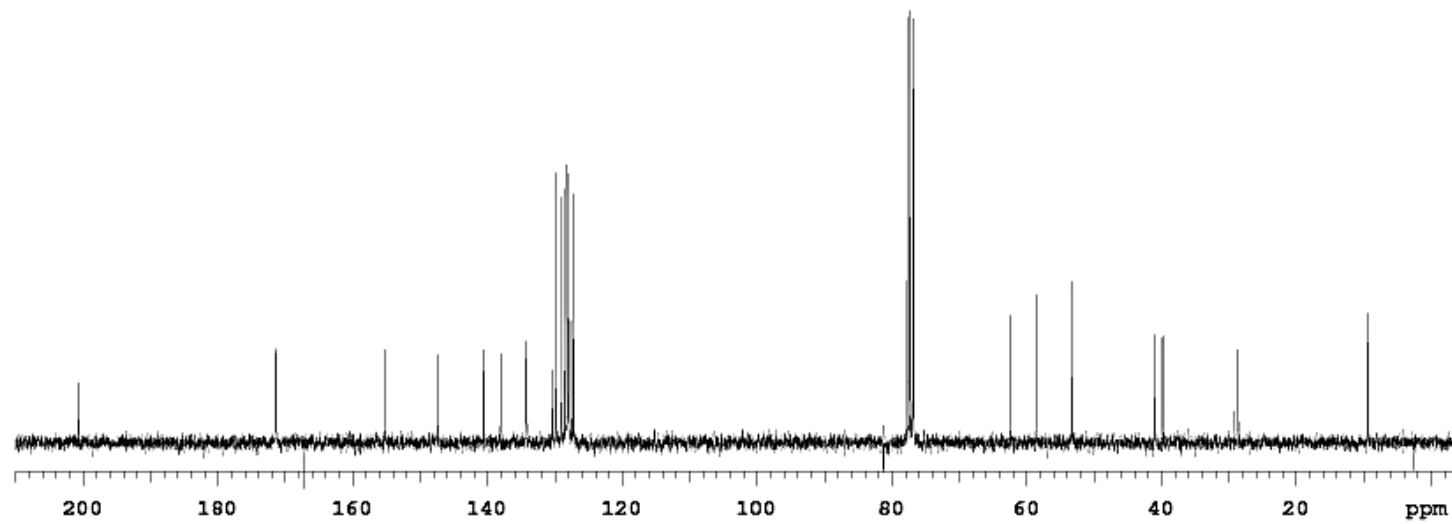



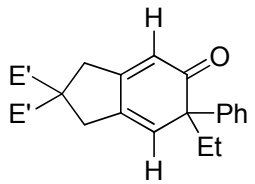

**3a**  
<sup>1</sup>H NMR (in CDCl<sub>3</sub>)

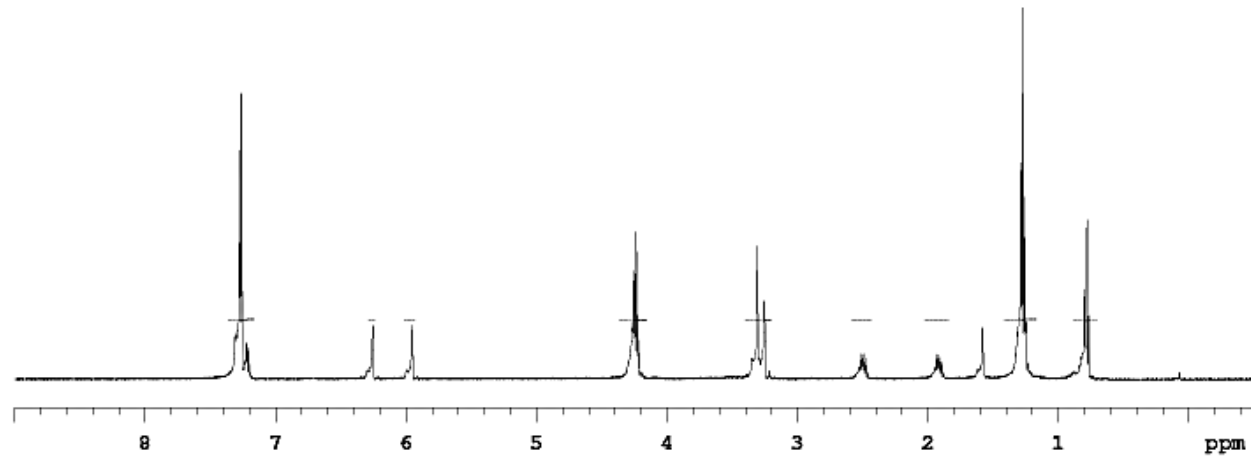

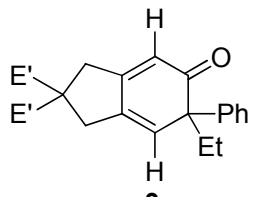

**3a**  
<sup>13</sup>C NMR (in CDCl<sub>3</sub>)

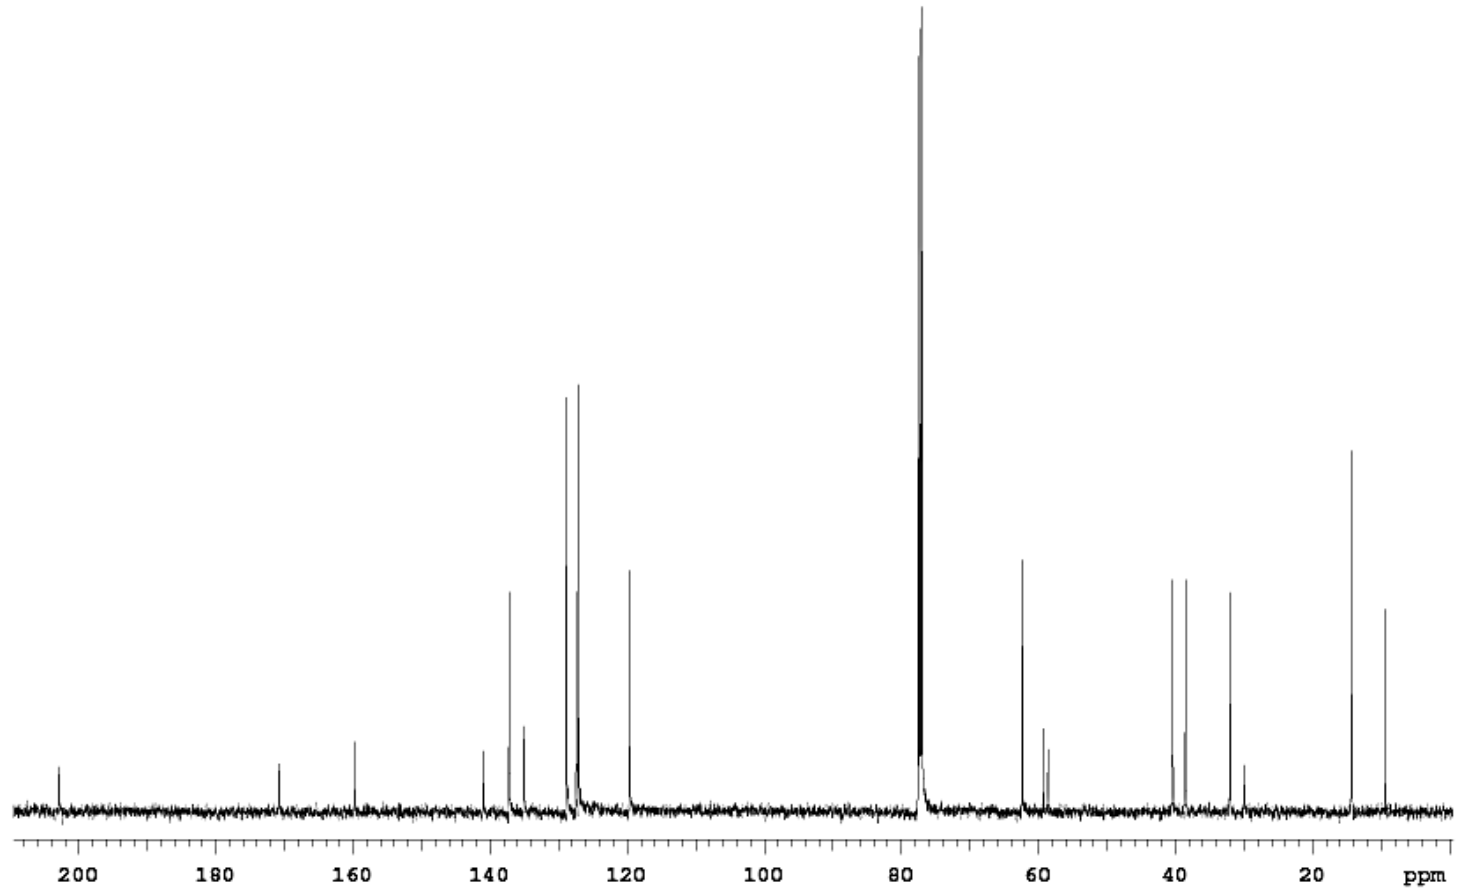

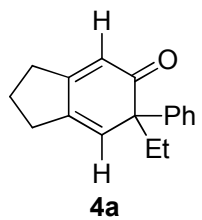

<sup>1</sup>H NMR (in CDCl<sub>3</sub>)

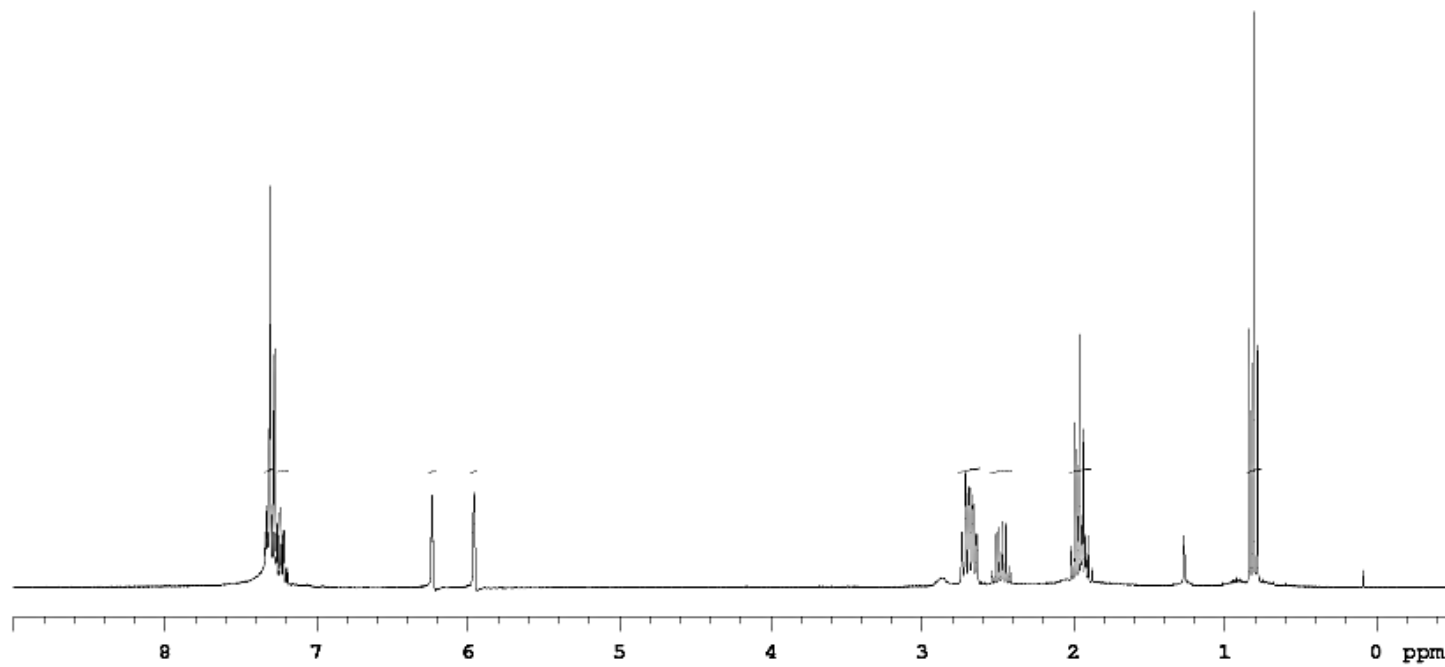

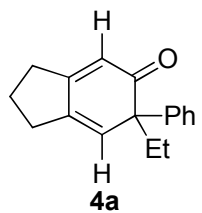

<sup>13</sup>C NMR (in CDCl<sub>3</sub>)

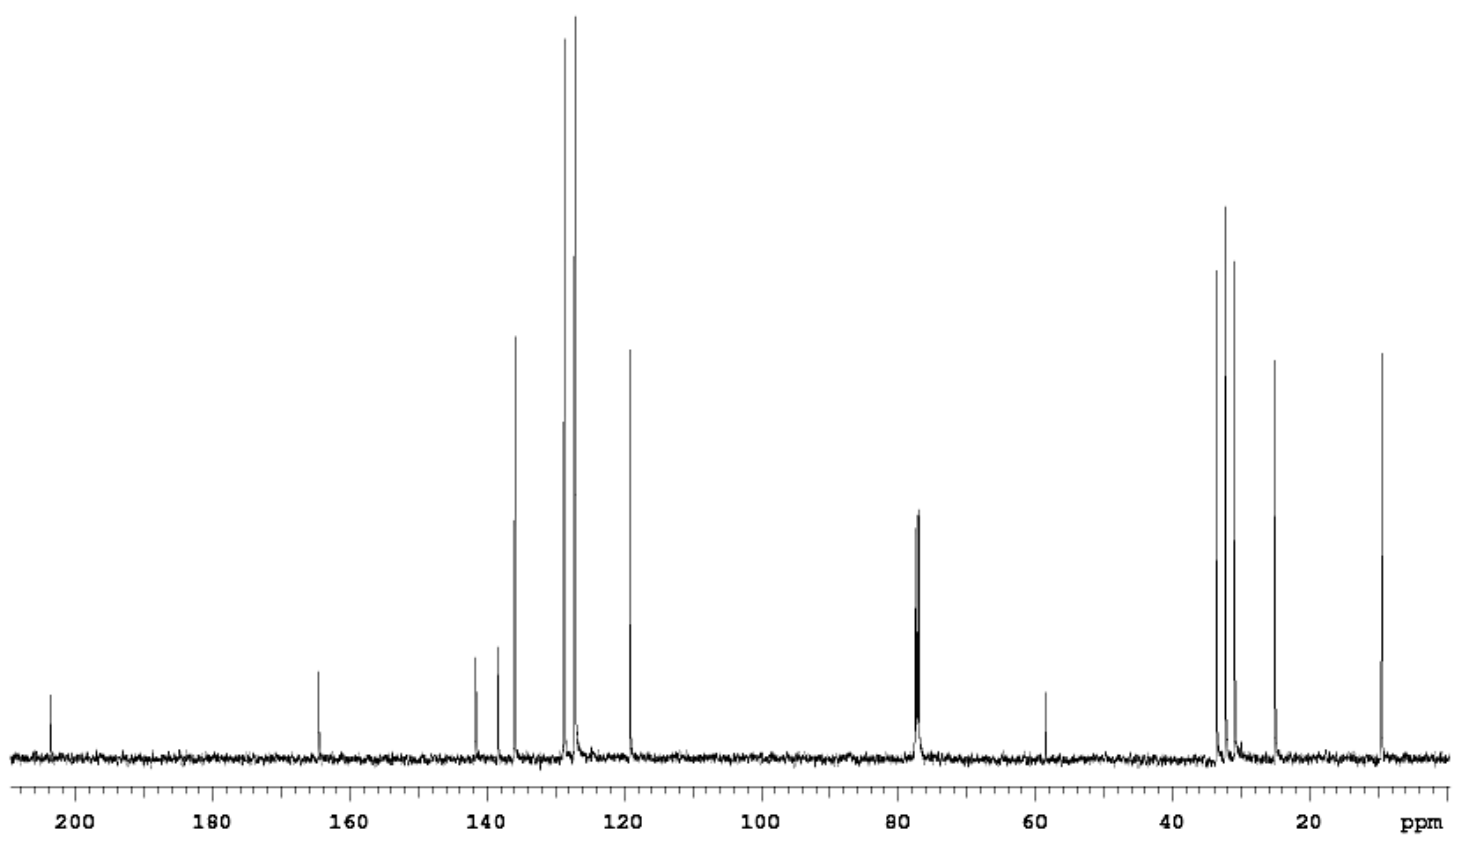

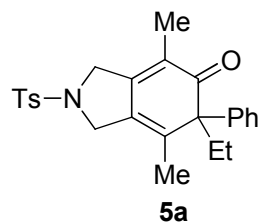

<sup>1</sup>H NMR (in CDCl<sub>3</sub>)

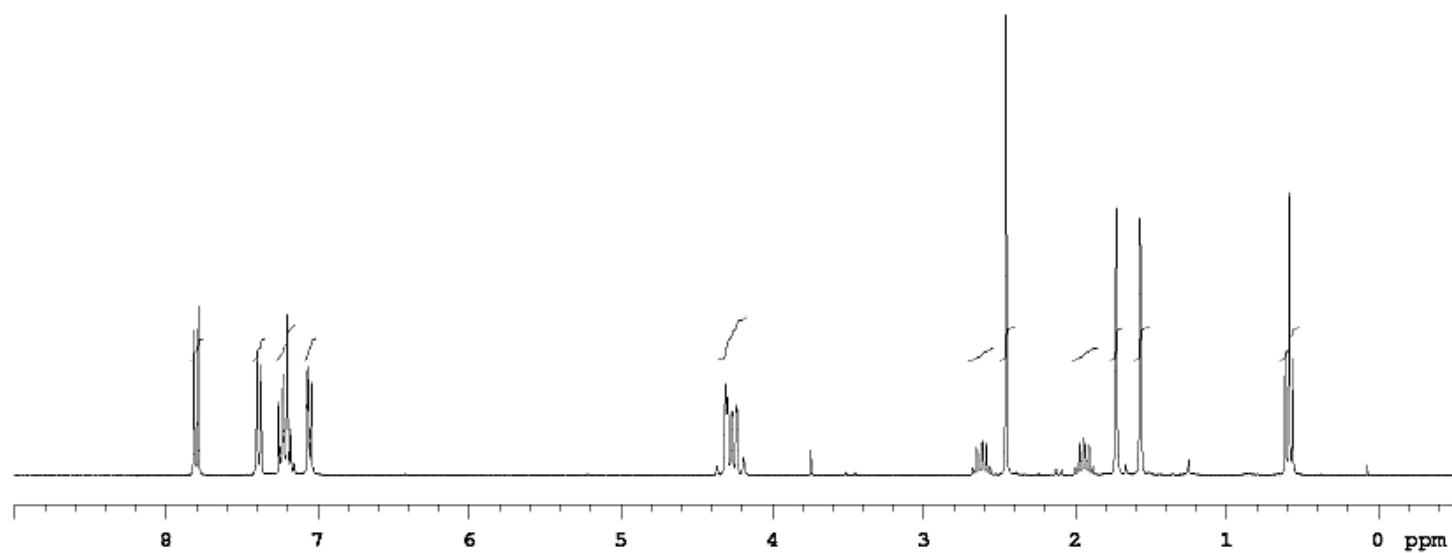

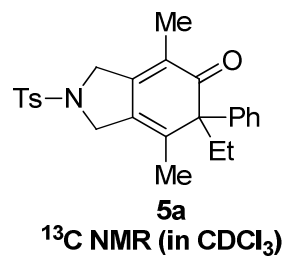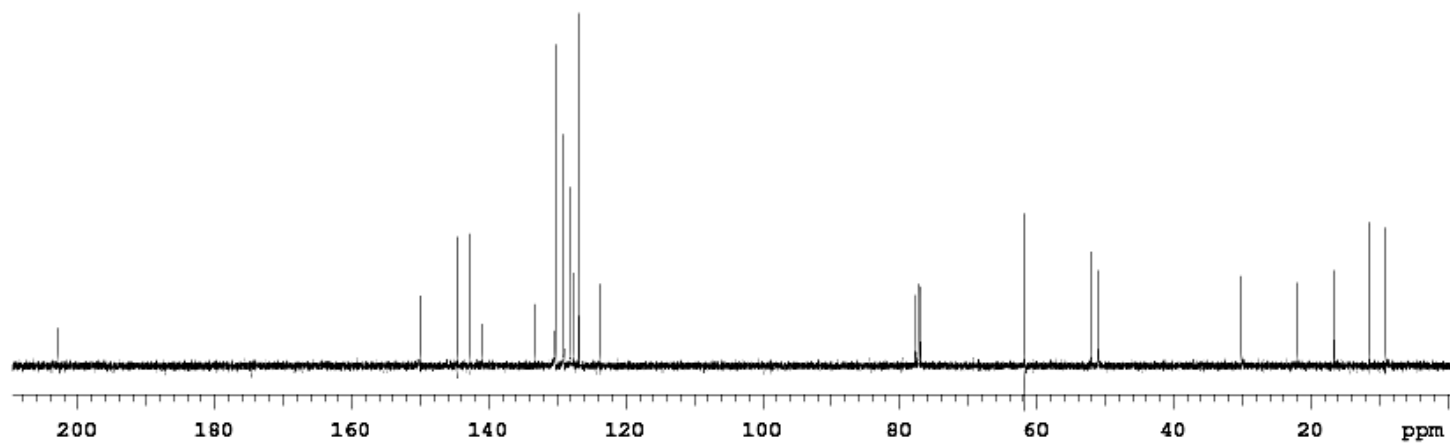

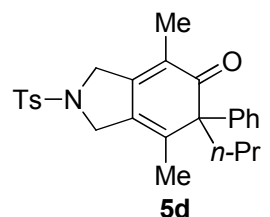

<sup>1</sup>H NMR (in CDCl<sub>3</sub>)

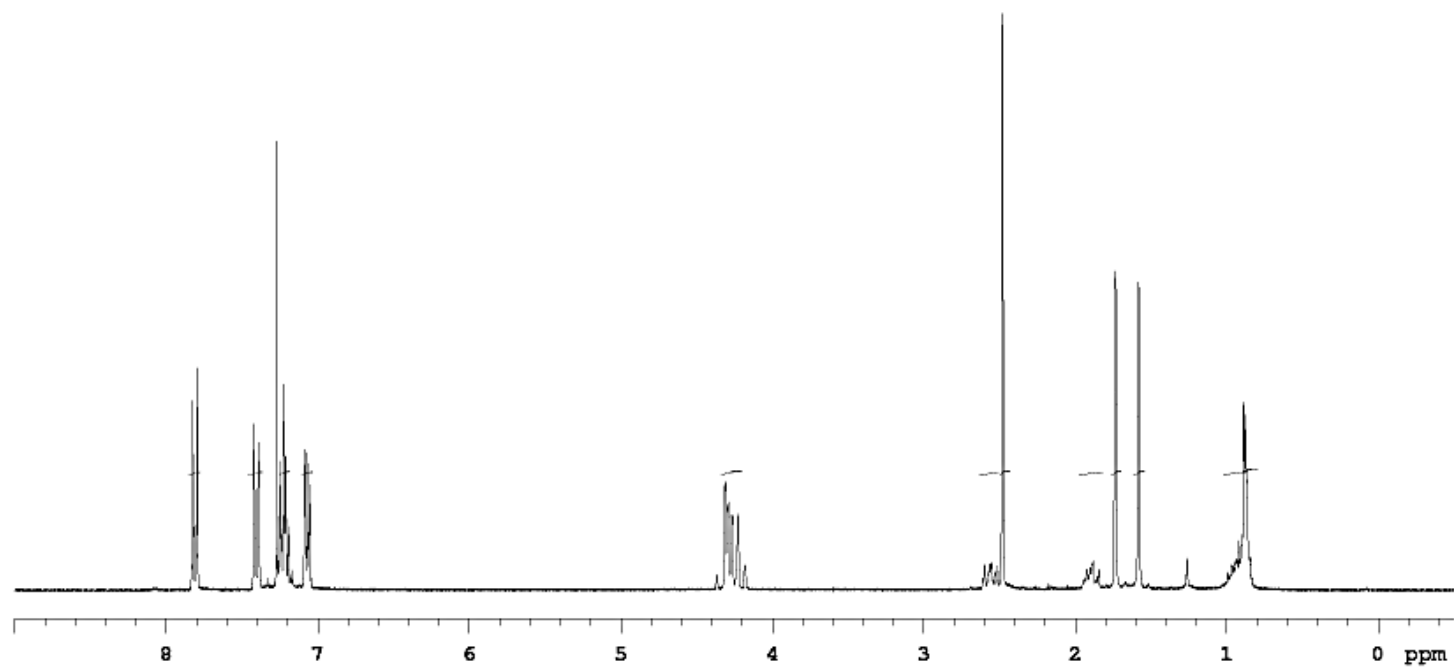

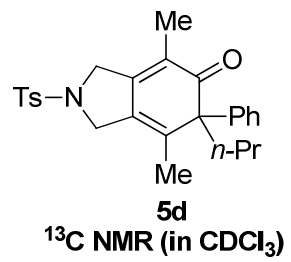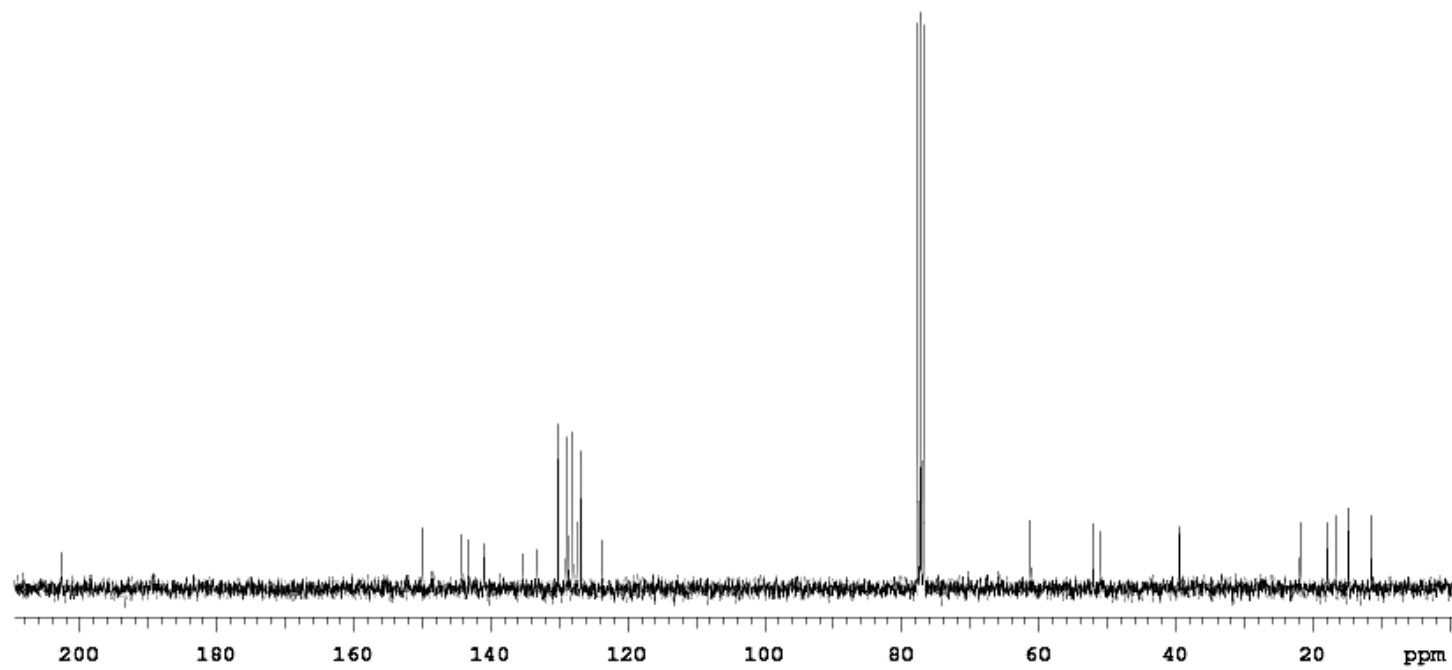



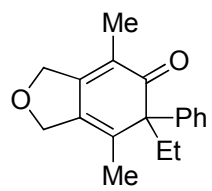

**6a**  
**<sup>1</sup>H NMR (in CDCl<sub>3</sub>)**

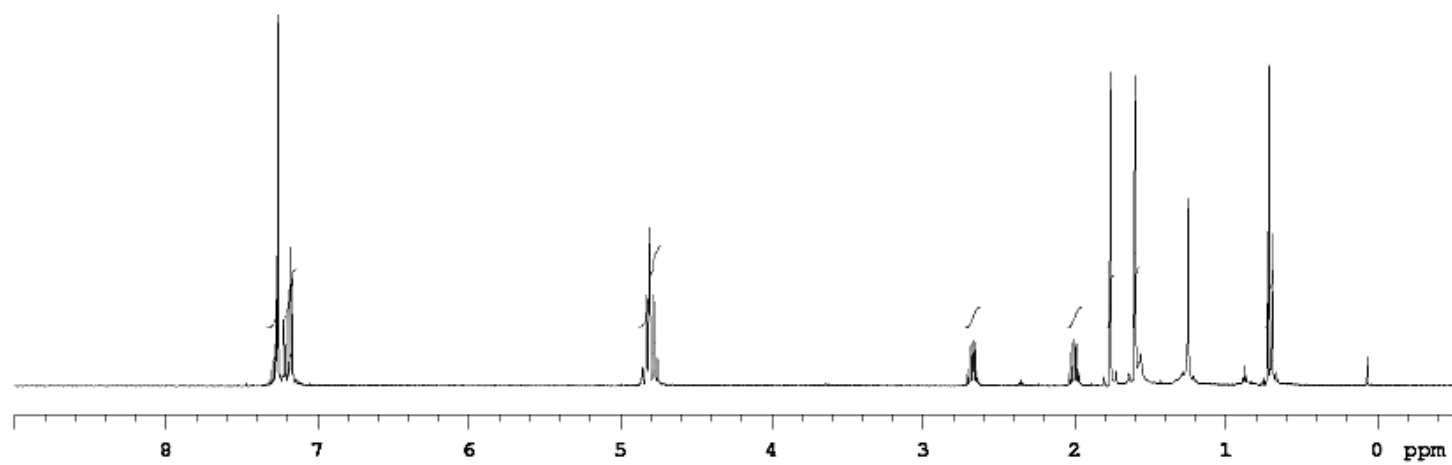

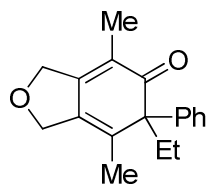

6a

$^{13}\text{C}$  NMR (in  $\text{CDCl}_3$ )

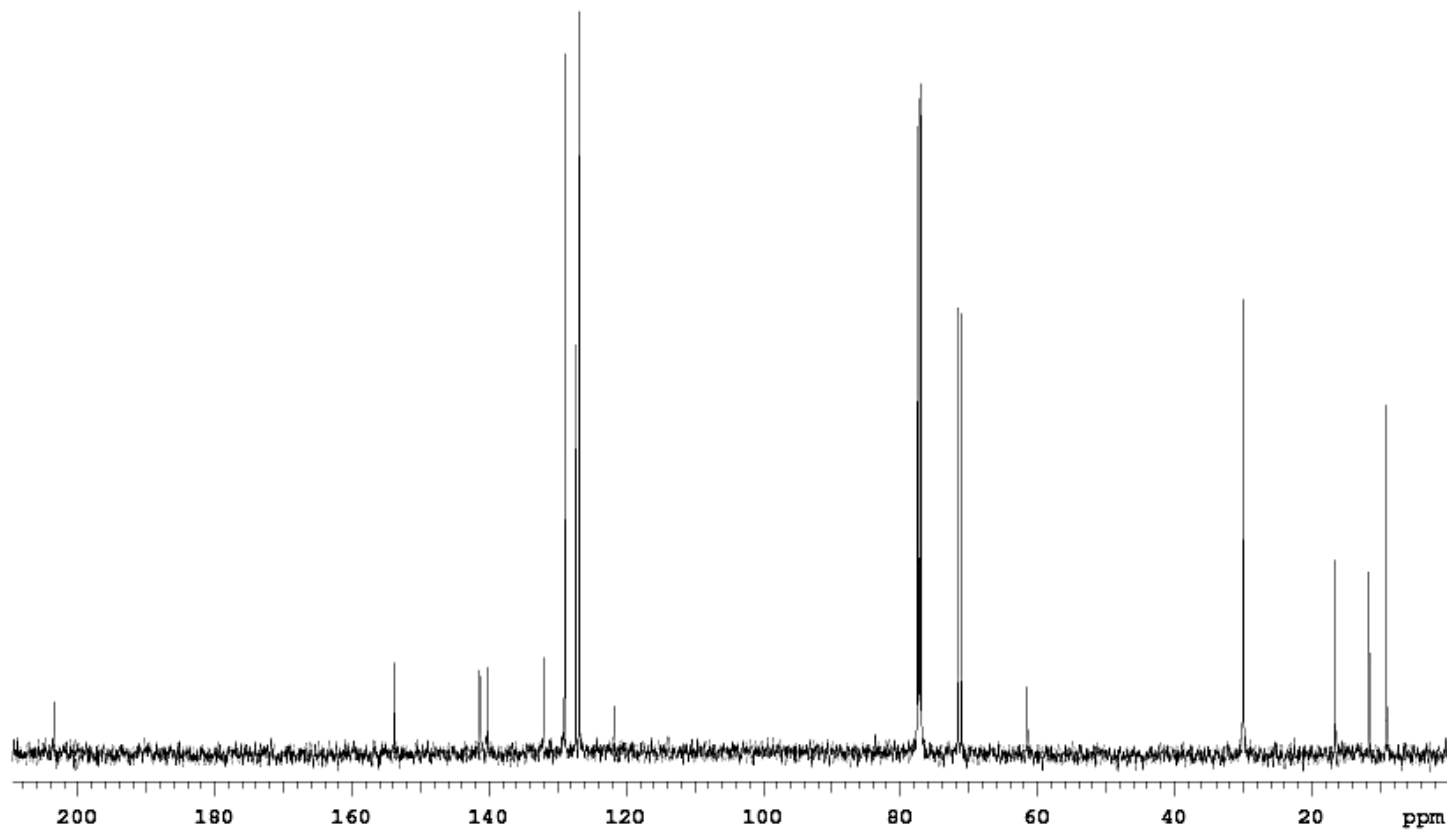

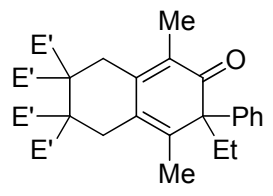

<sup>1</sup>H NMR (in CDCl<sub>3</sub>)

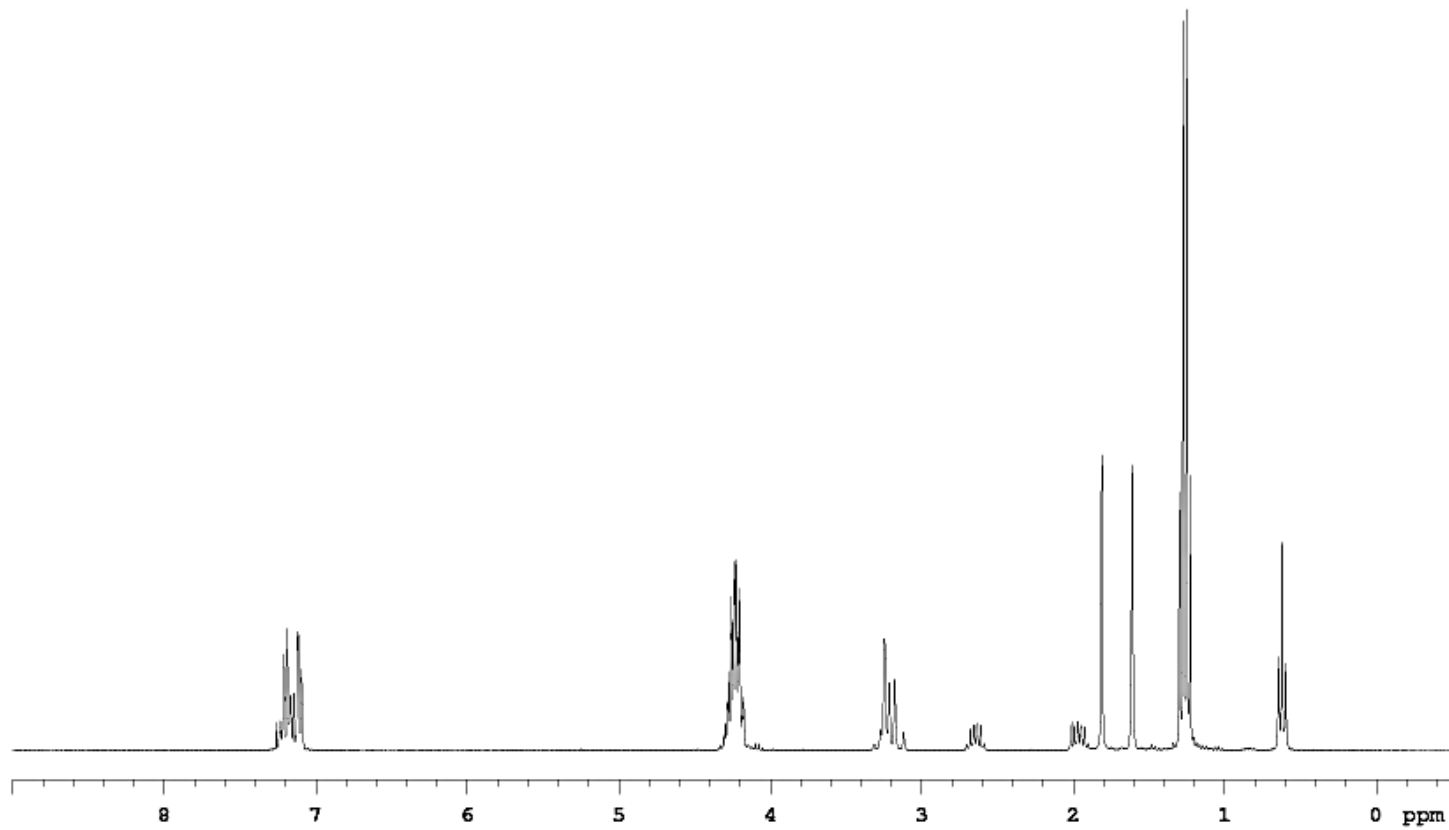

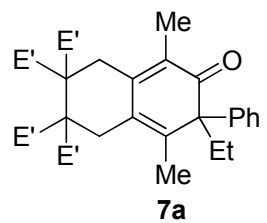

<sup>13</sup>C NMR (in CDCl<sub>3</sub>)

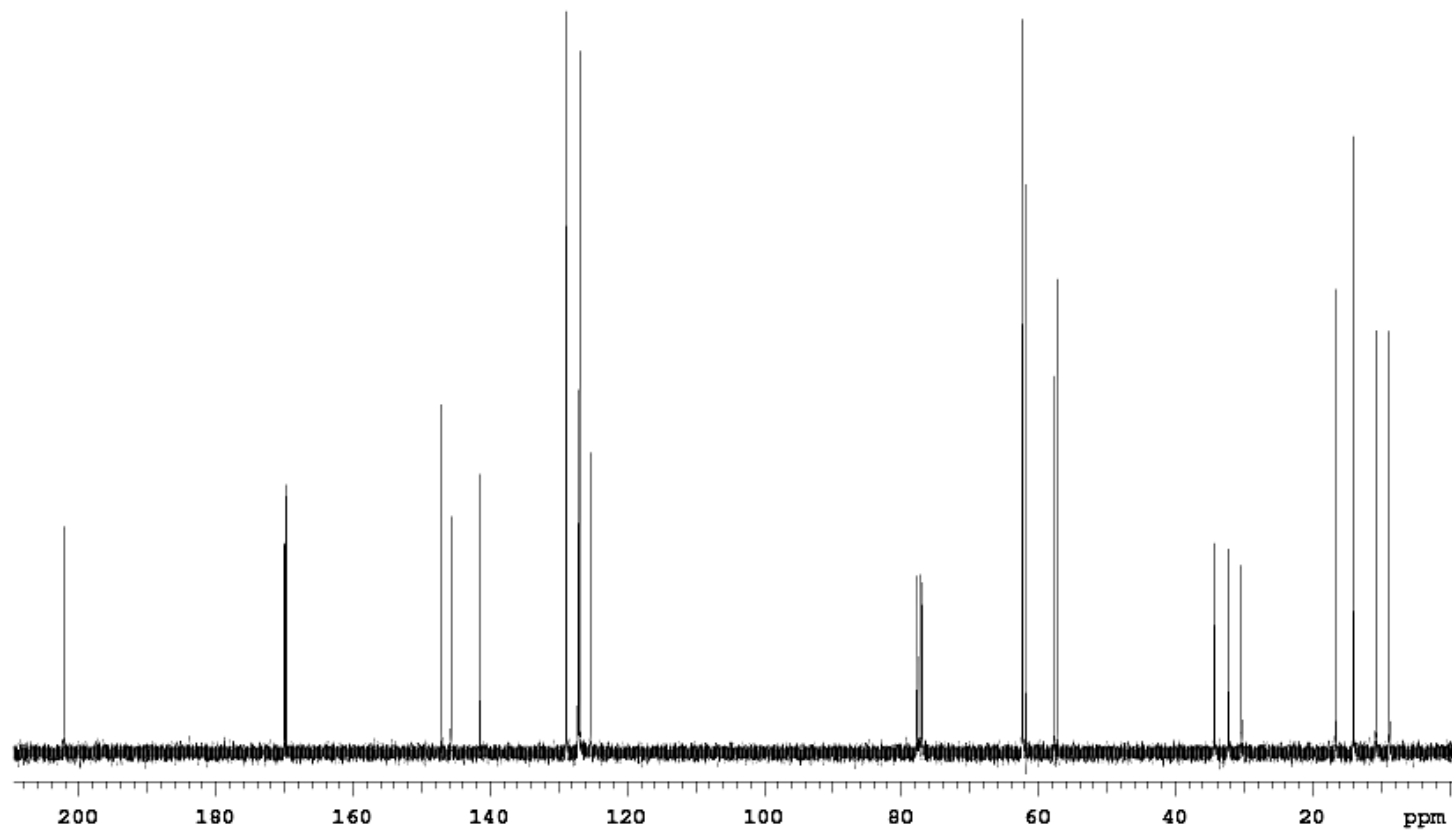

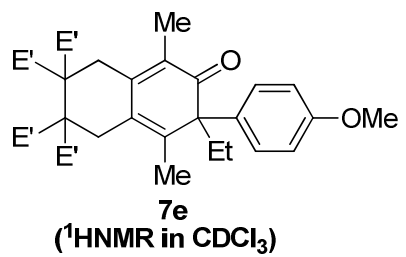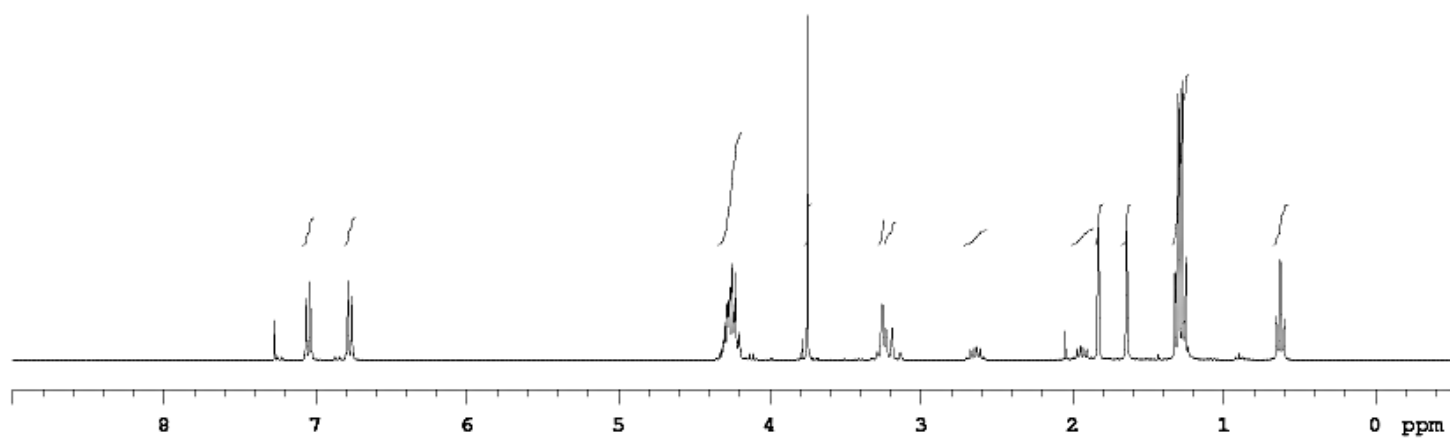

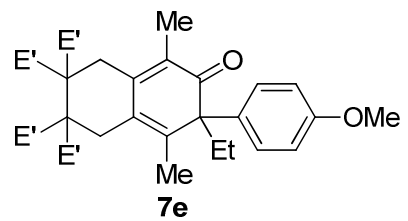

<sup>13</sup>C NMR (in CDCl<sub>3</sub>)

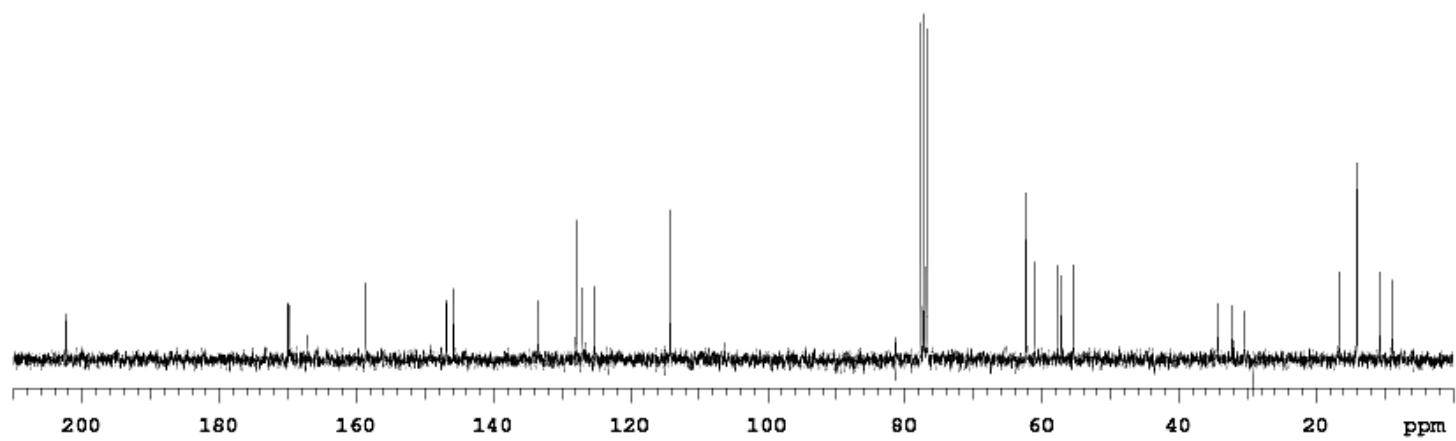

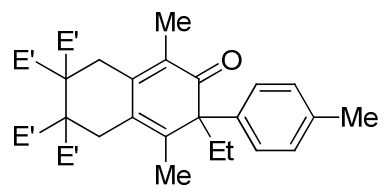

**<sup>1</sup>H NMR (in CDCl<sub>3</sub>)**

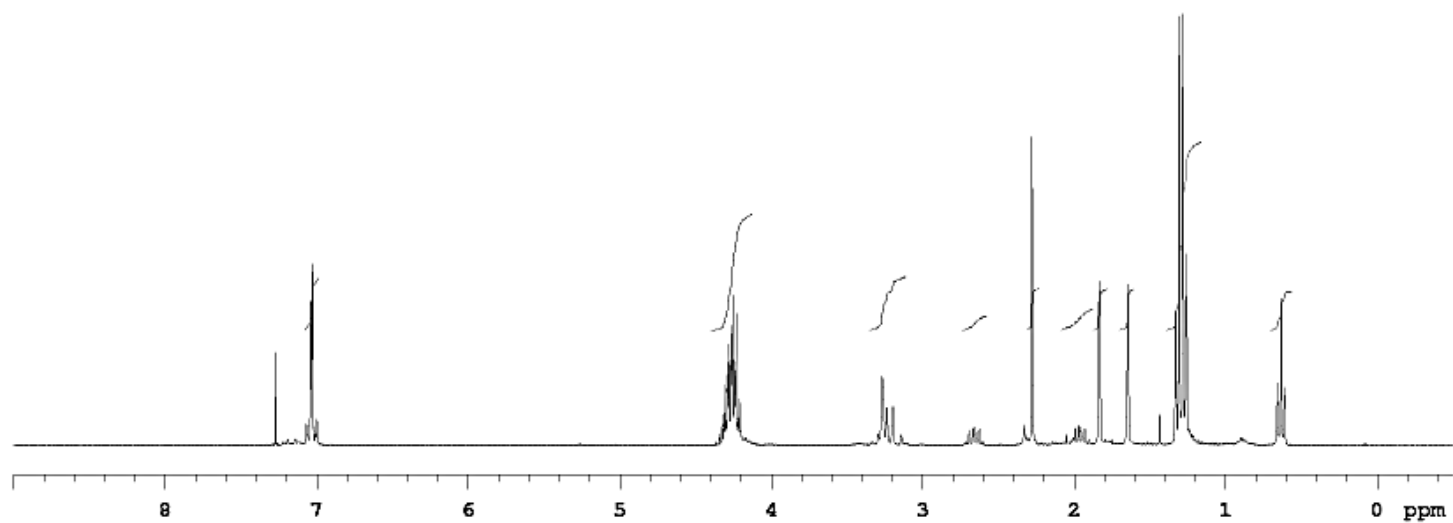

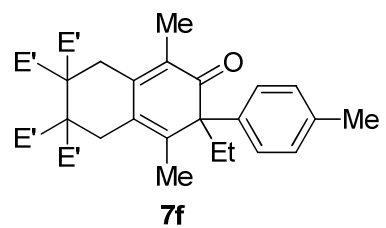

<sup>13</sup>C NMR (in CDCl<sub>3</sub>)

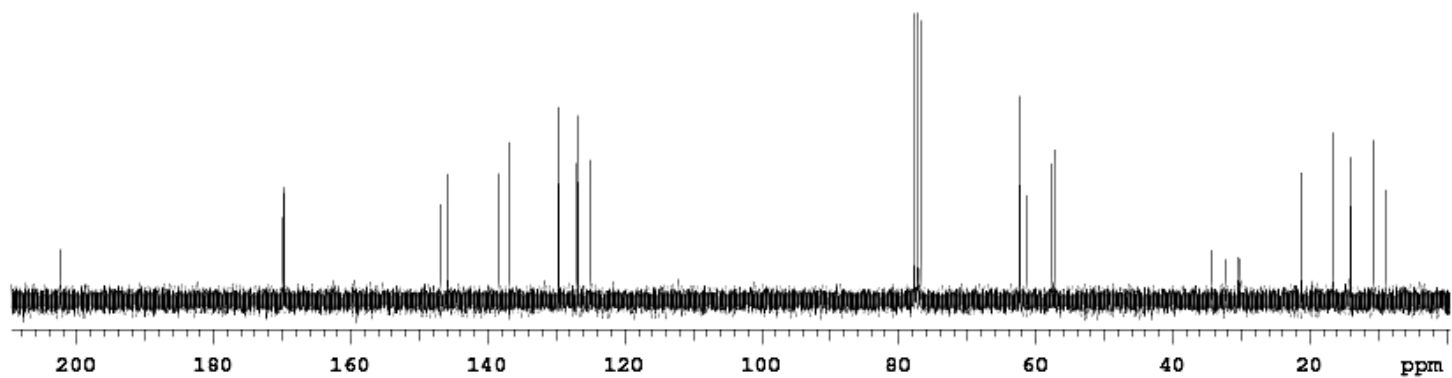



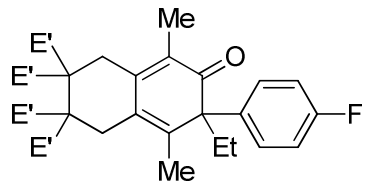

**7g**  
<sup>1</sup>H NMR (in CDCl<sub>3</sub>)

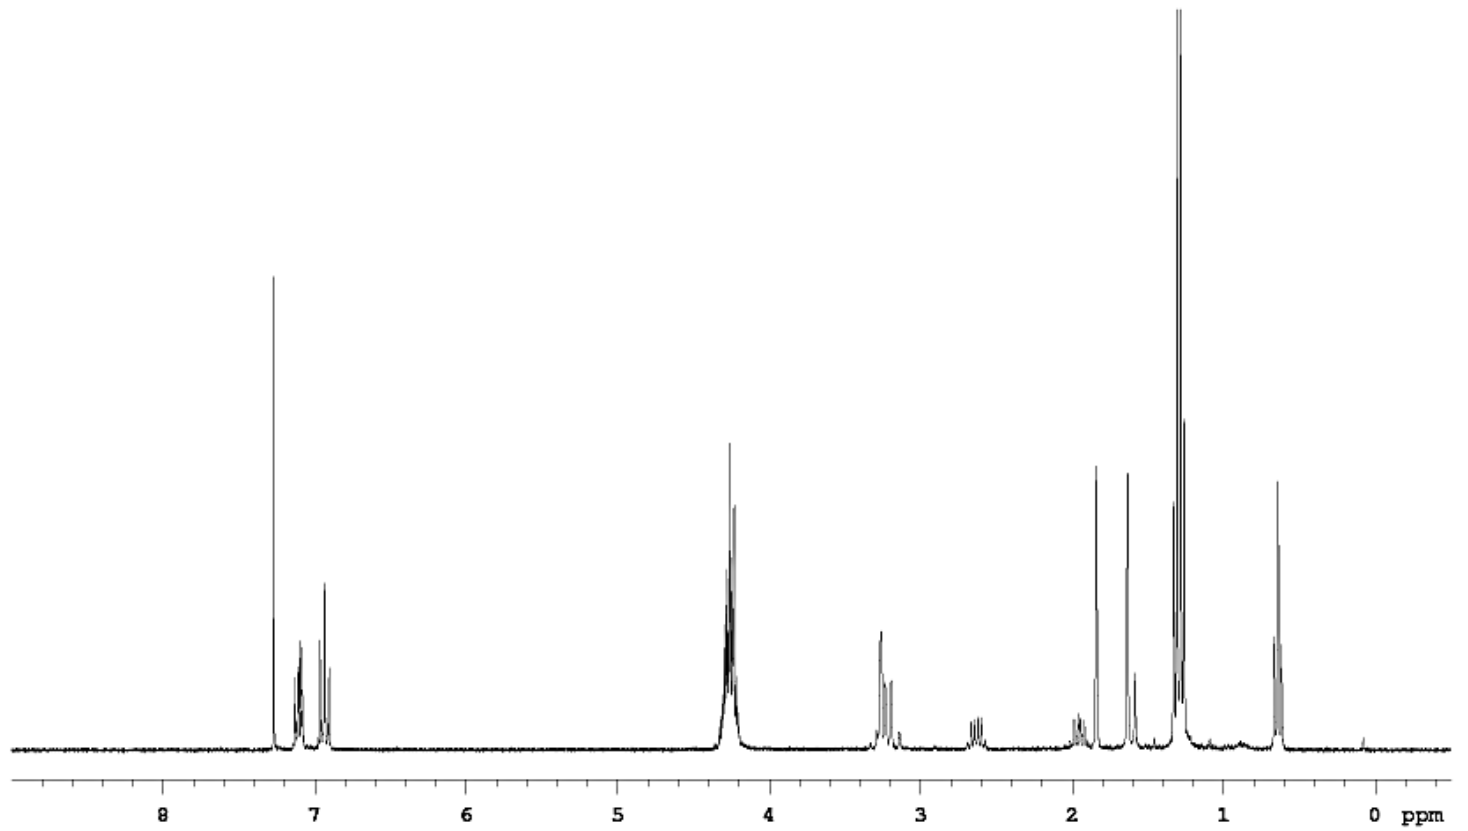

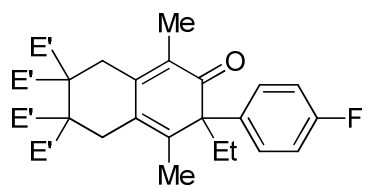

**7g**  
**<sup>13</sup>C NMR (in CDCl<sub>3</sub>)**

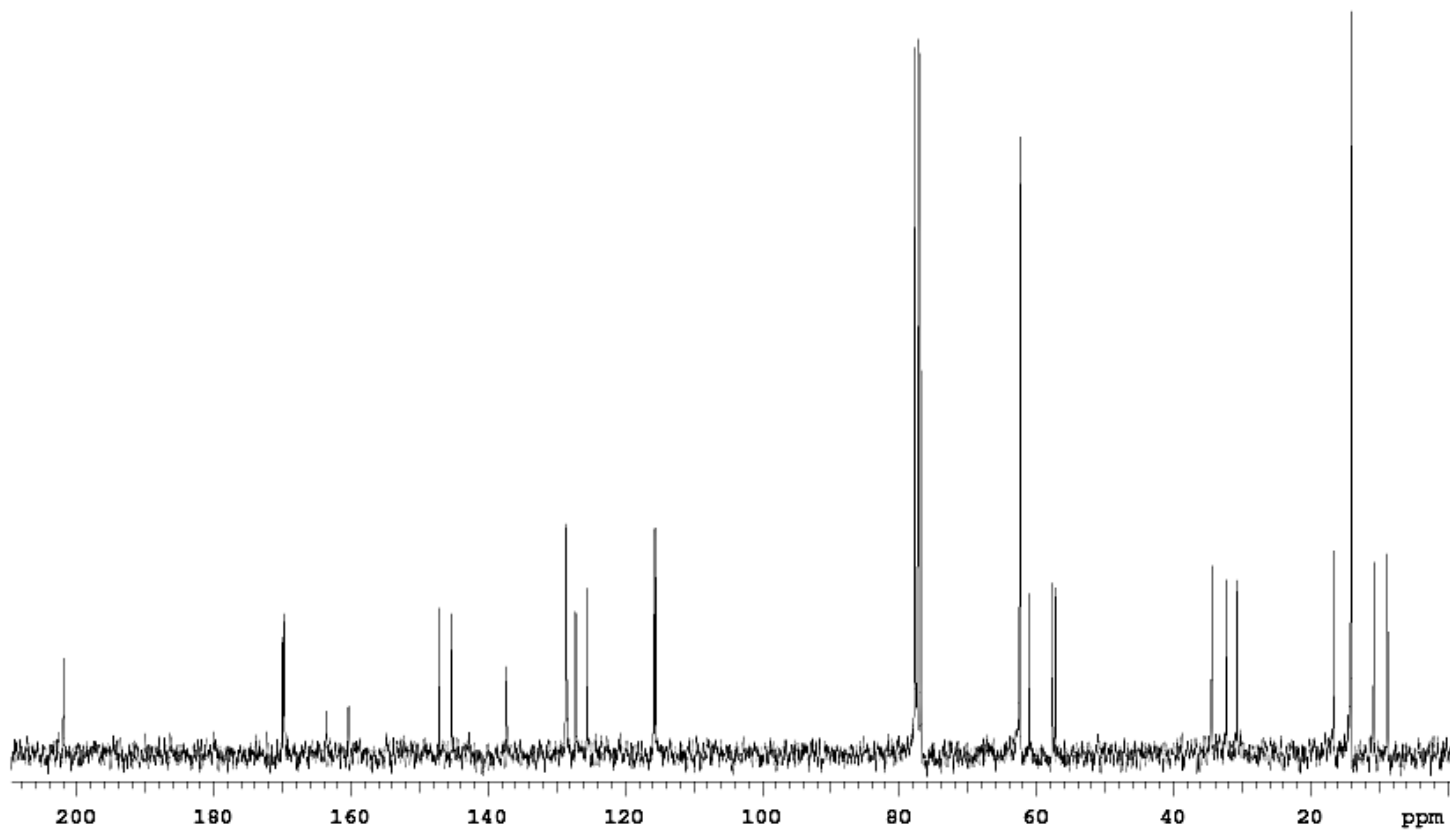

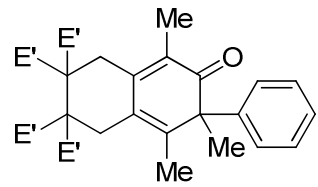

7h  
<sup>1</sup>H NMR (in CDCl<sub>3</sub>)

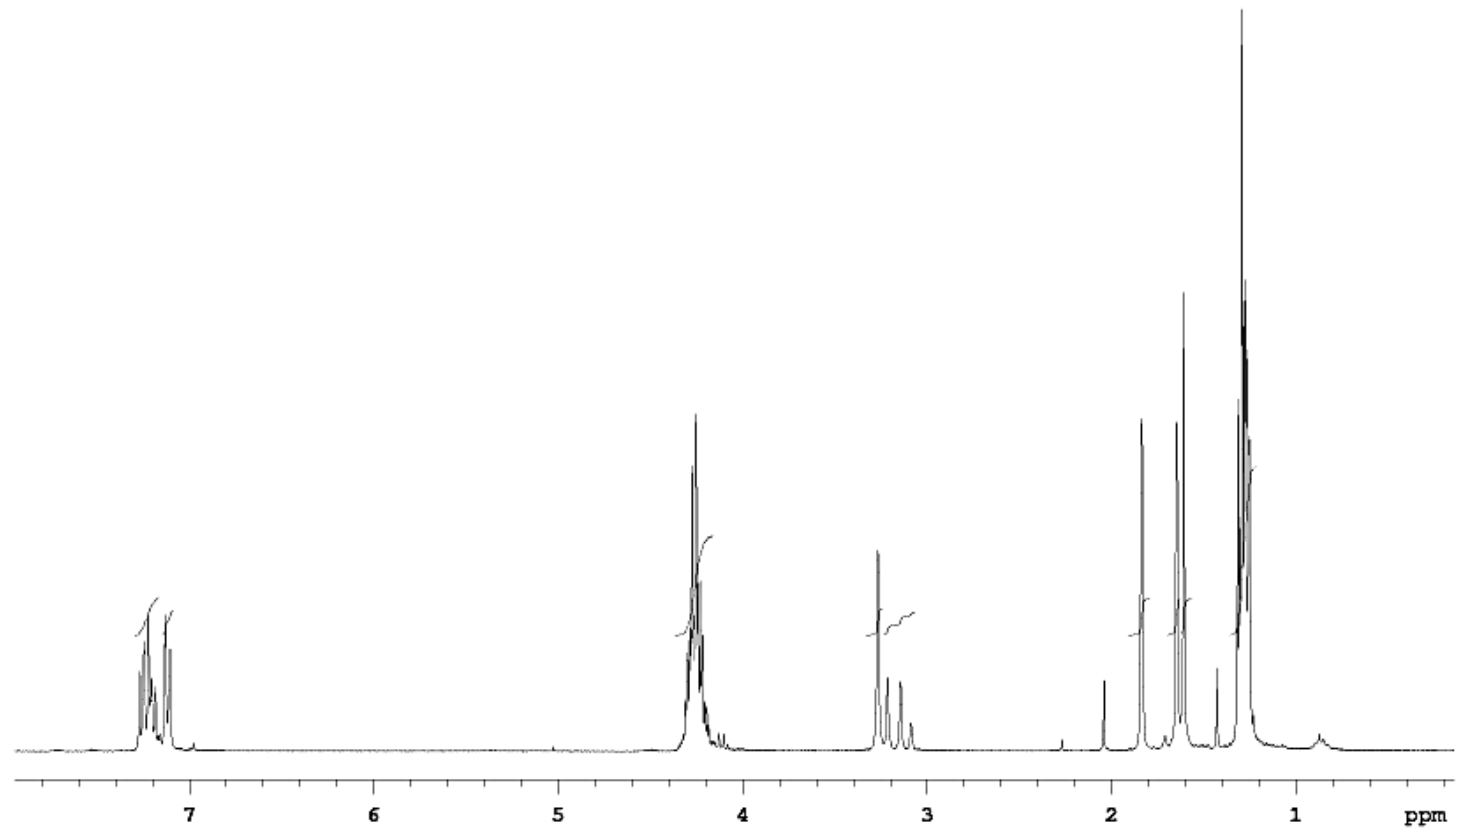

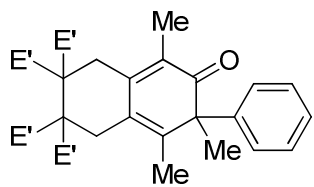

7h  
<sup>13</sup>C NMR (in CDCl<sub>3</sub>)

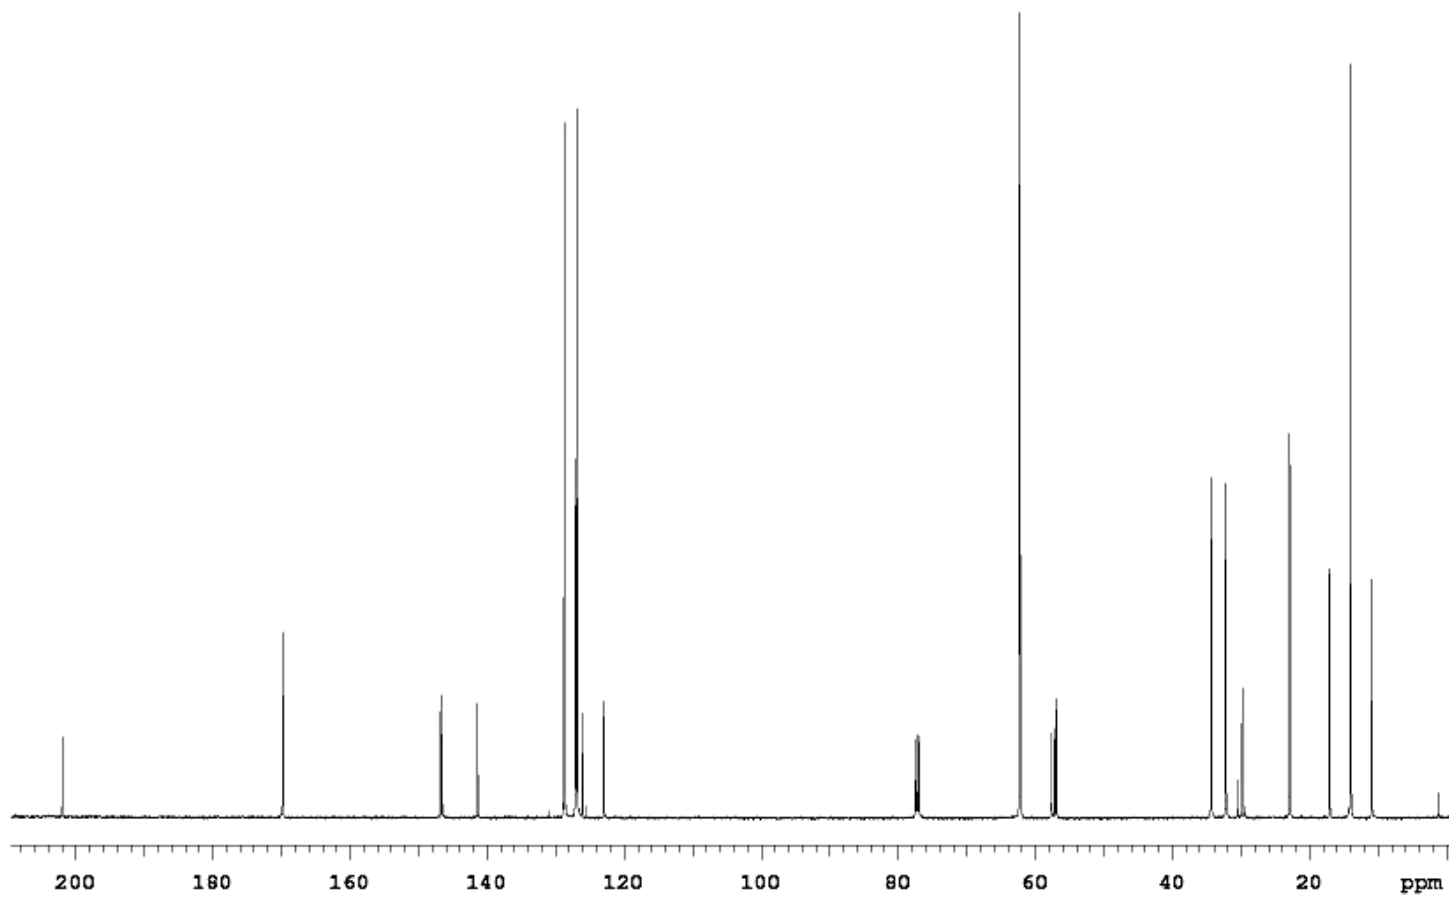

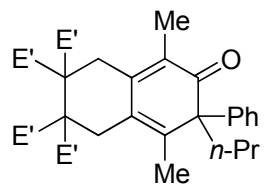

7d

$^1\text{H NMR}$  (in  $\text{CDCl}_3$ )

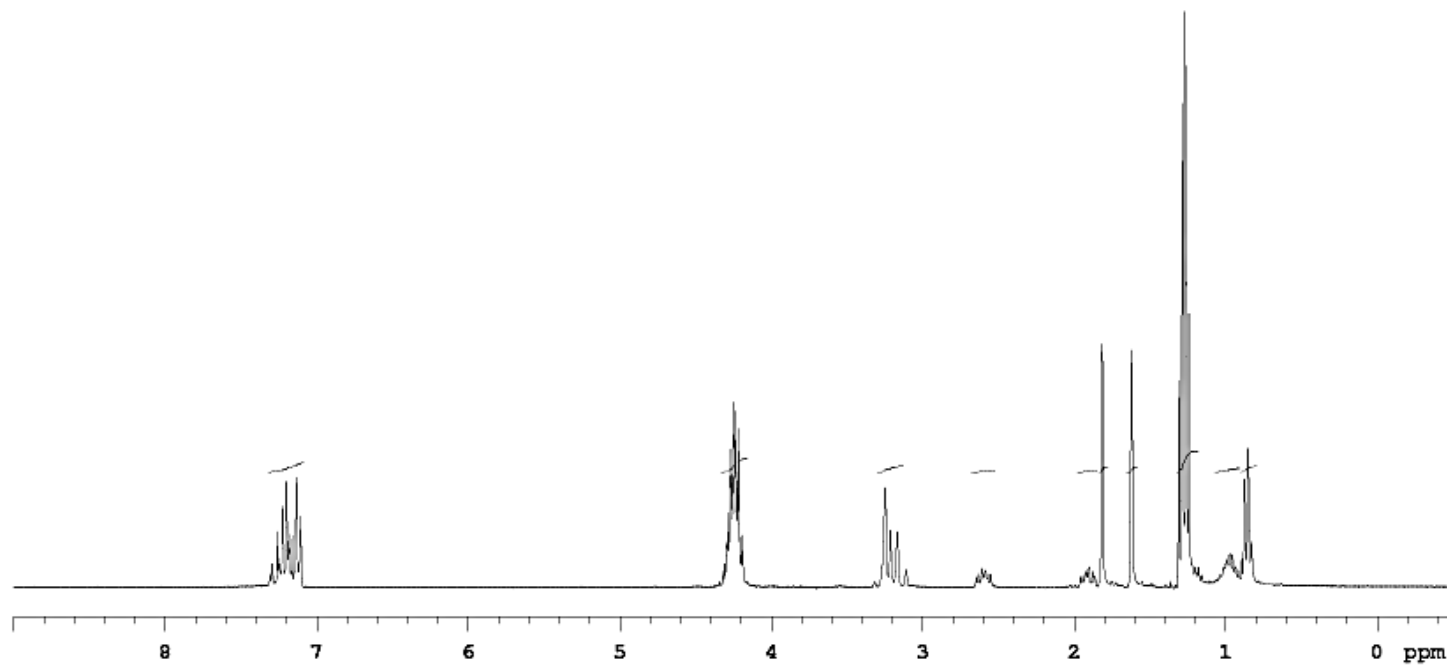

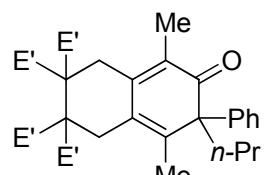

7d

$^{13}\text{C}$  NMR (in  $\text{CDCl}_3$ )

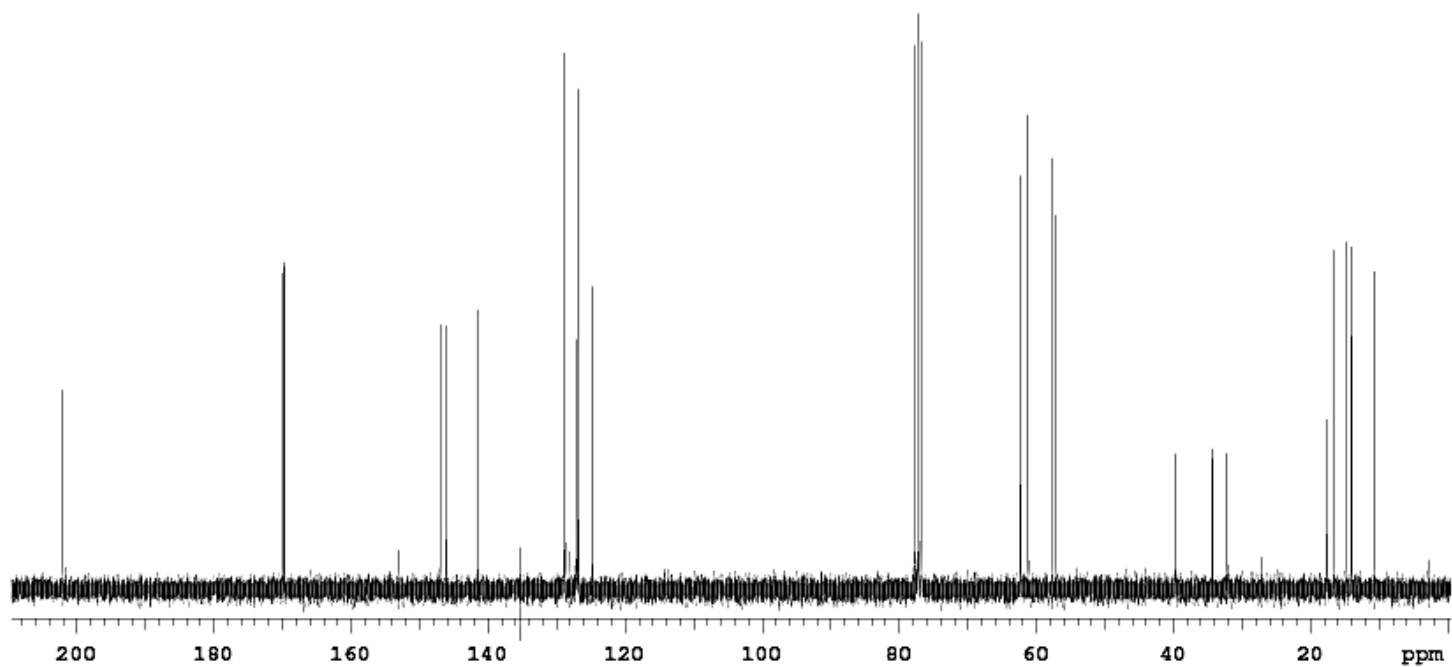

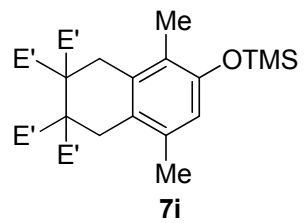

<sup>1</sup>H NMR (in CDCl<sub>3</sub>)

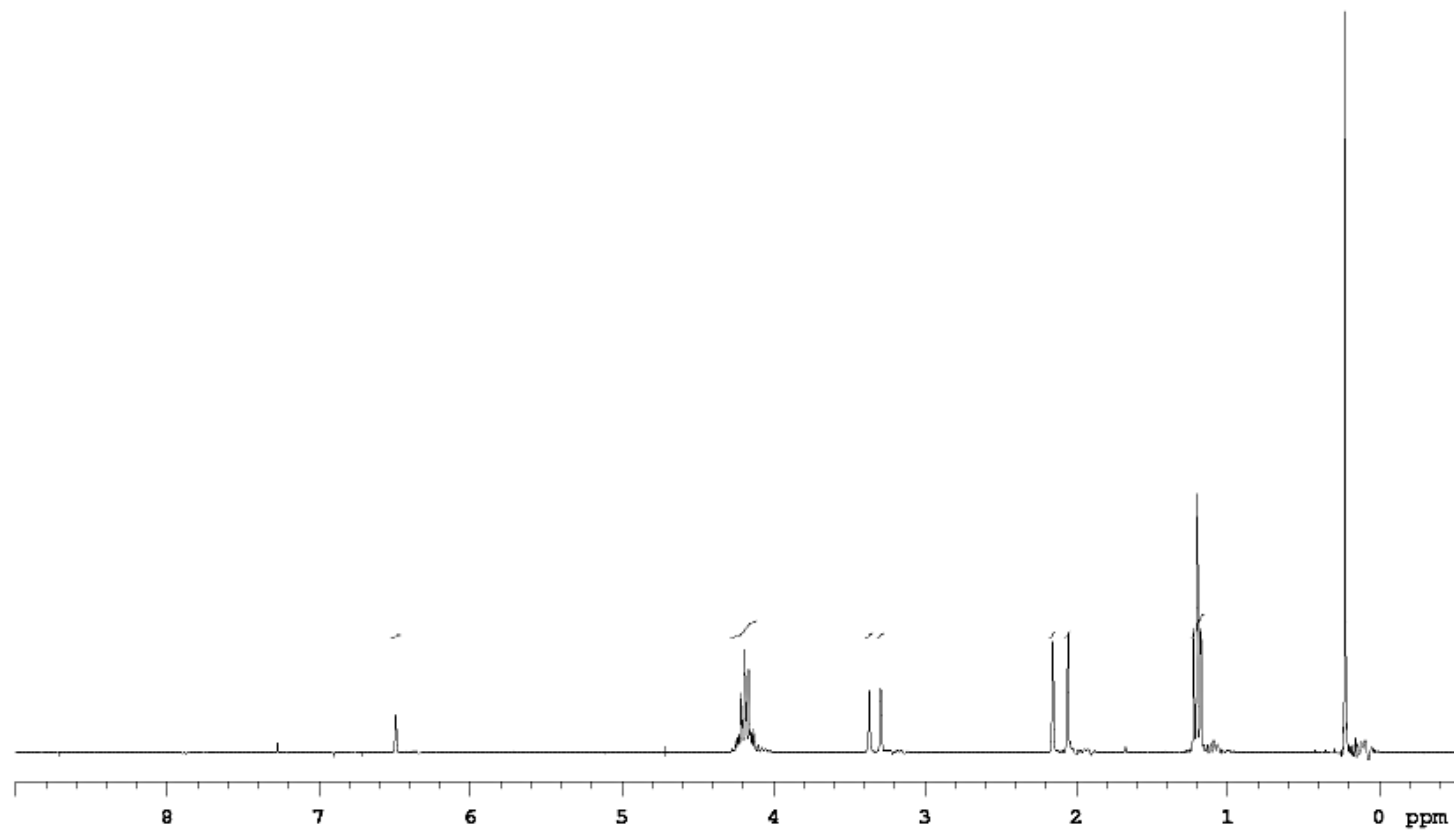

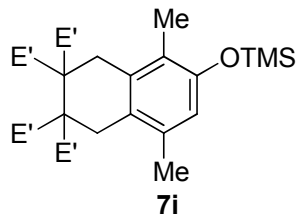

$^{13}\text{C}$  NMR (in  $\text{CDCl}_3$ )

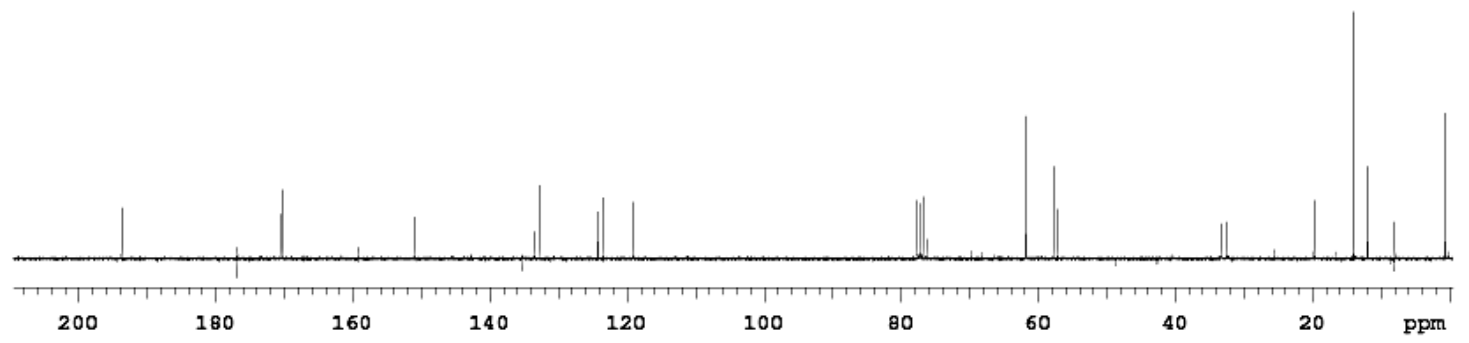



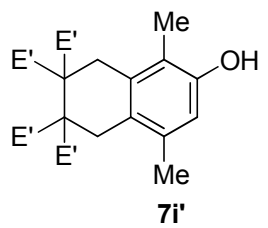

<sup>1</sup>H NMR (in CDCl<sub>3</sub>)

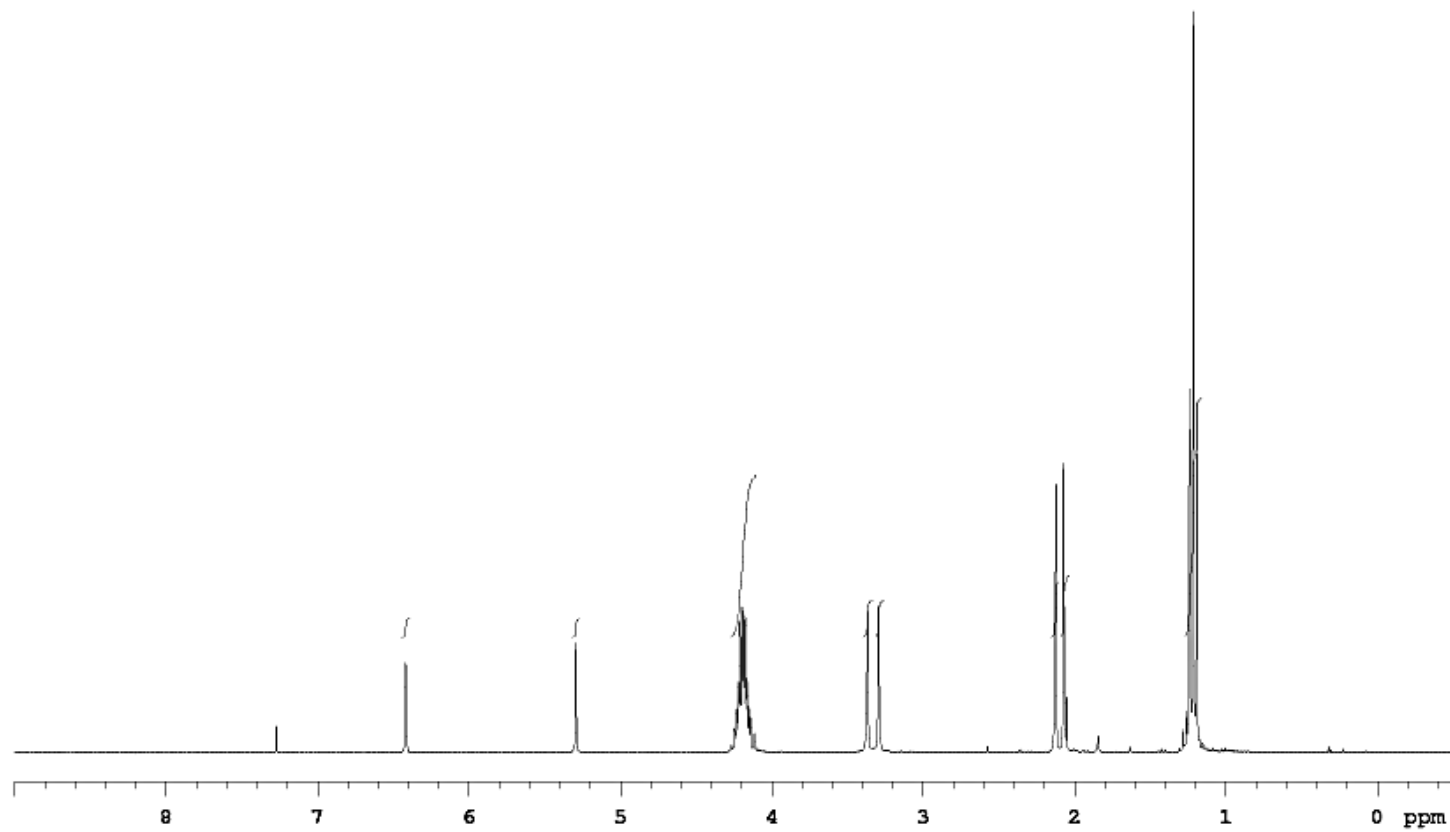

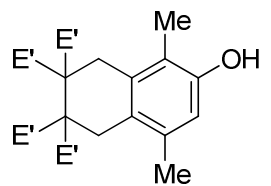

**7i'**  
**<sup>13</sup>C NMR (in CDCl<sub>3</sub>)**

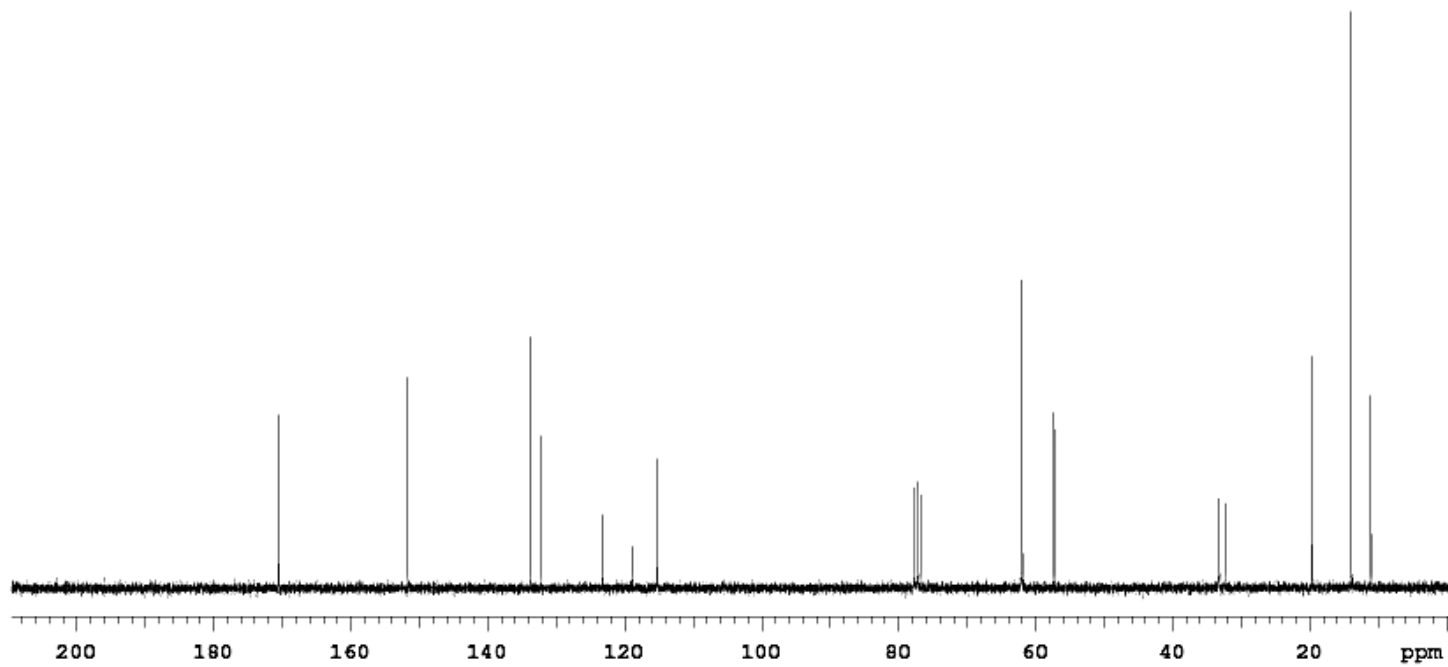



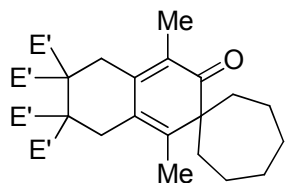

7j

$^{13}\text{C}$  NMR (in  $\text{CDCl}_3$ )

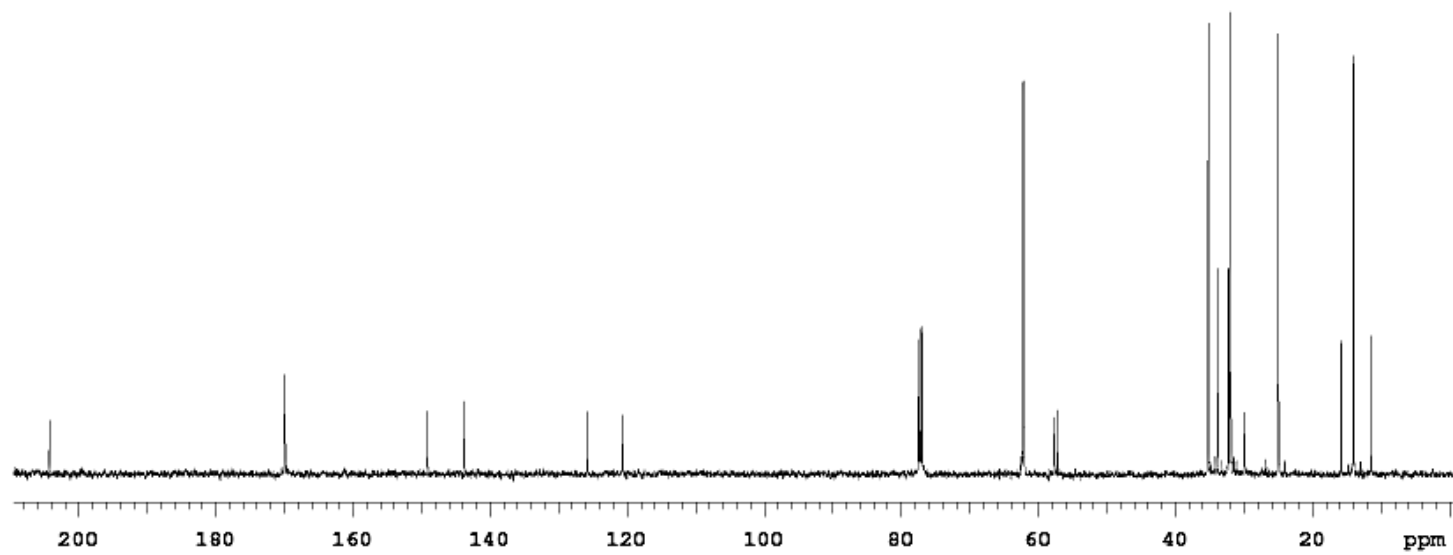

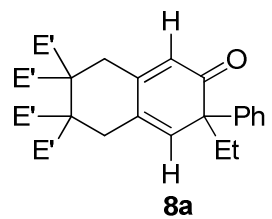

<sup>1</sup>H NMR (in CDCl<sub>3</sub>)

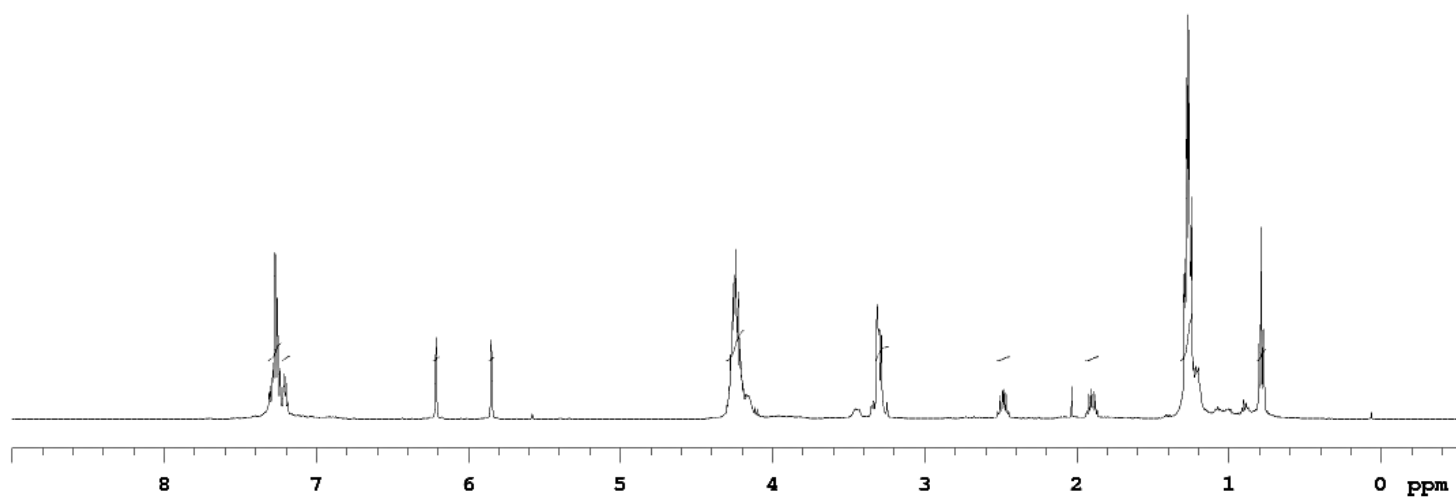

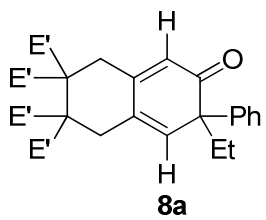

$^{13}\text{C}$  NMR (in  $\text{CDCl}_3$ )

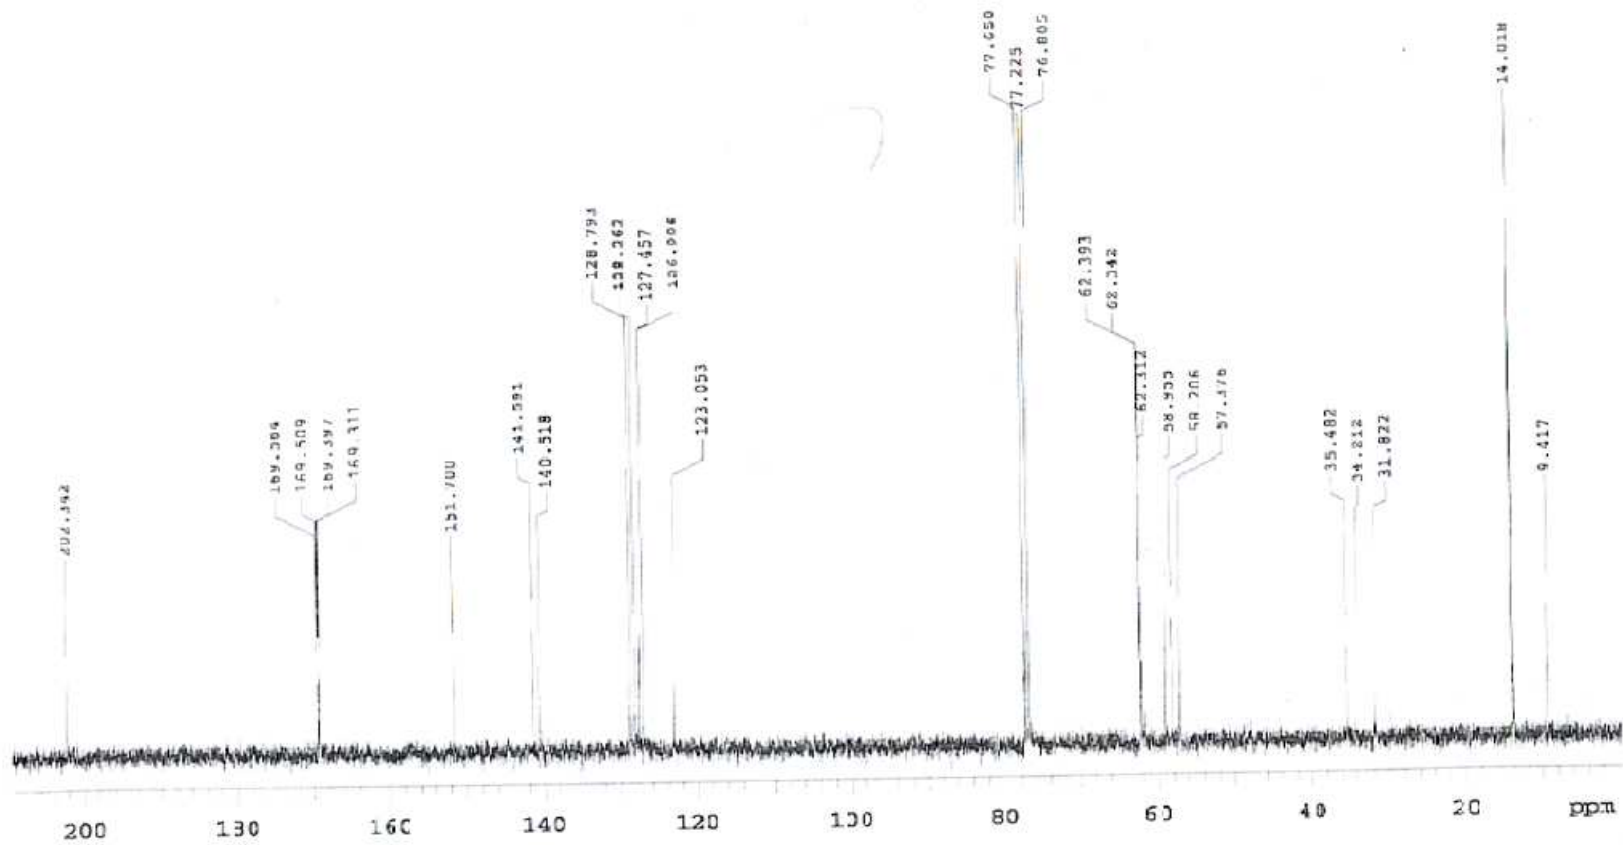

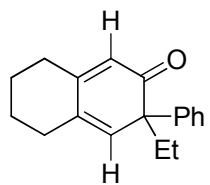

9a

$^1\text{H NMR}$  (in  $\text{CDCl}_3$ )

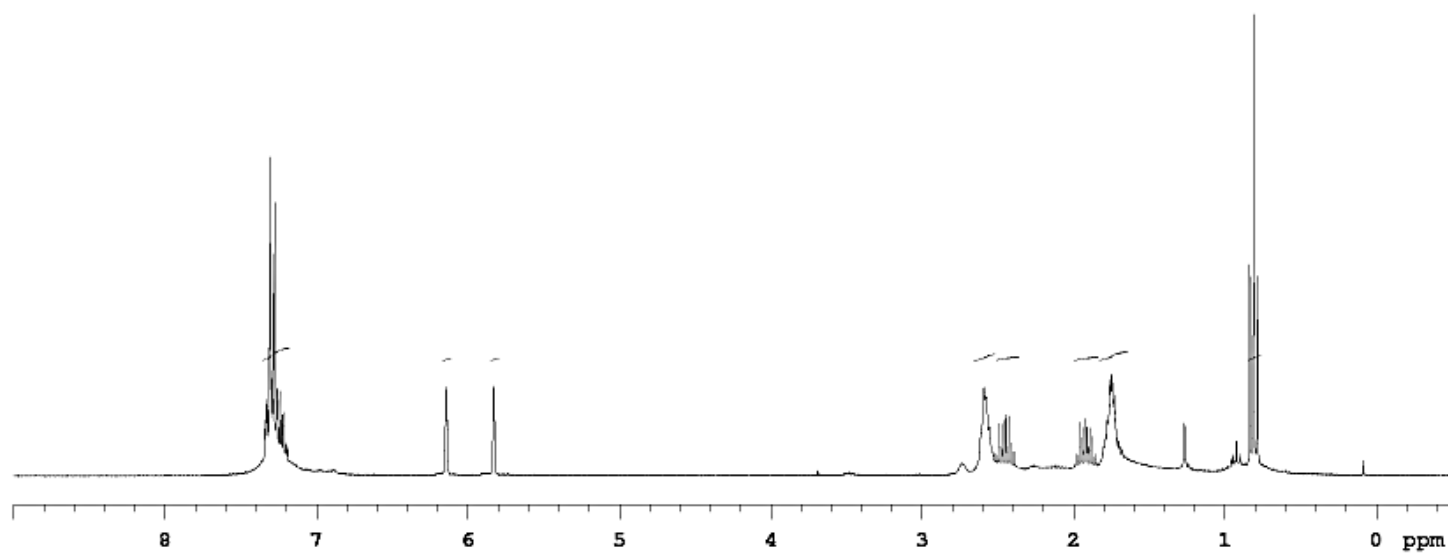

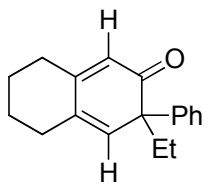

**9a**

$^{13}\text{C}$  NMR (in  $\text{CDCl}_3$ )

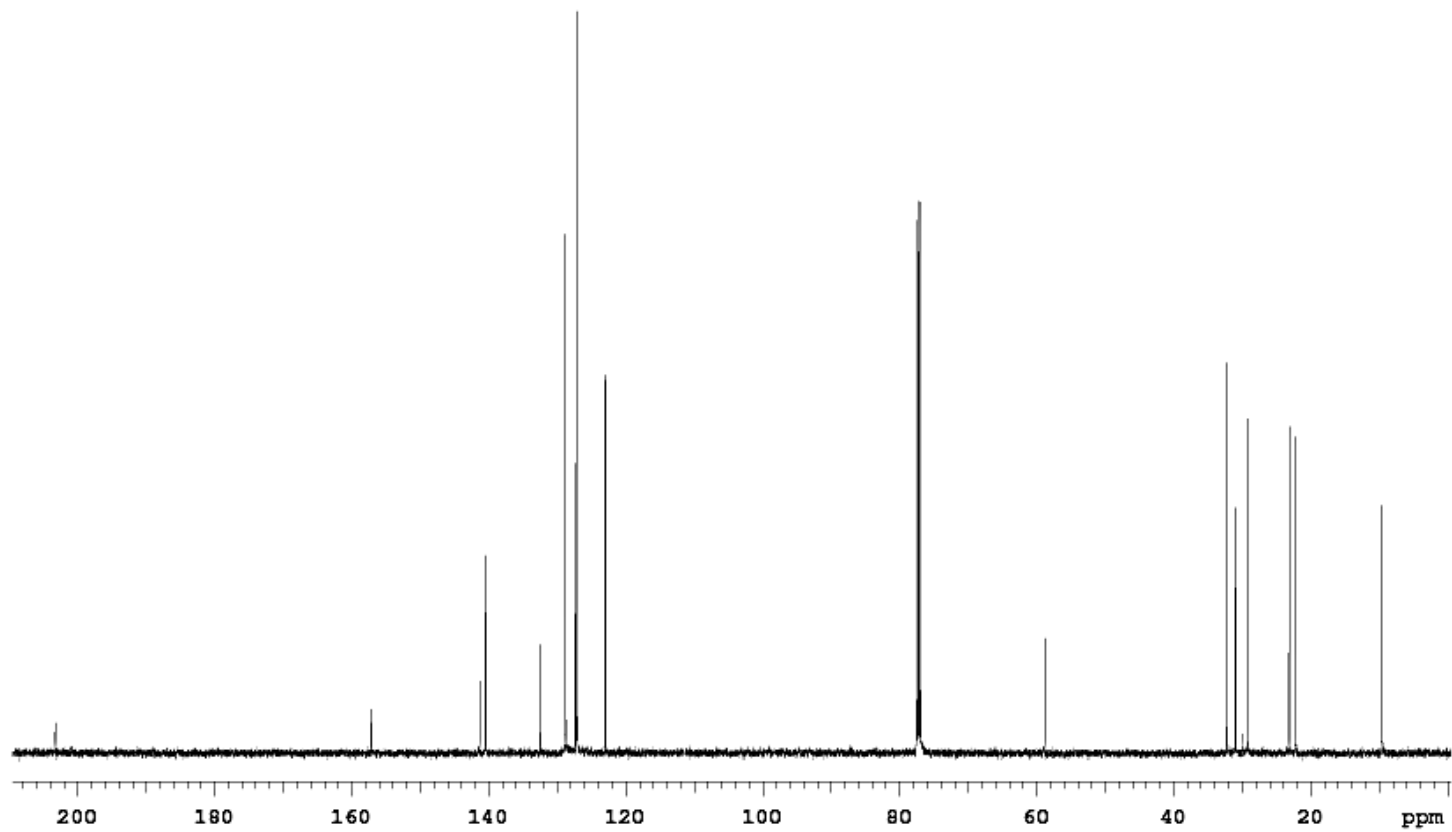



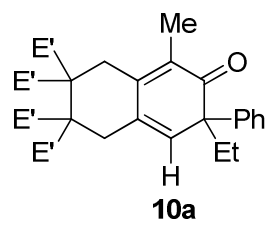

$^1\text{H}$  NMR (in  $\text{CDCl}_3$ )

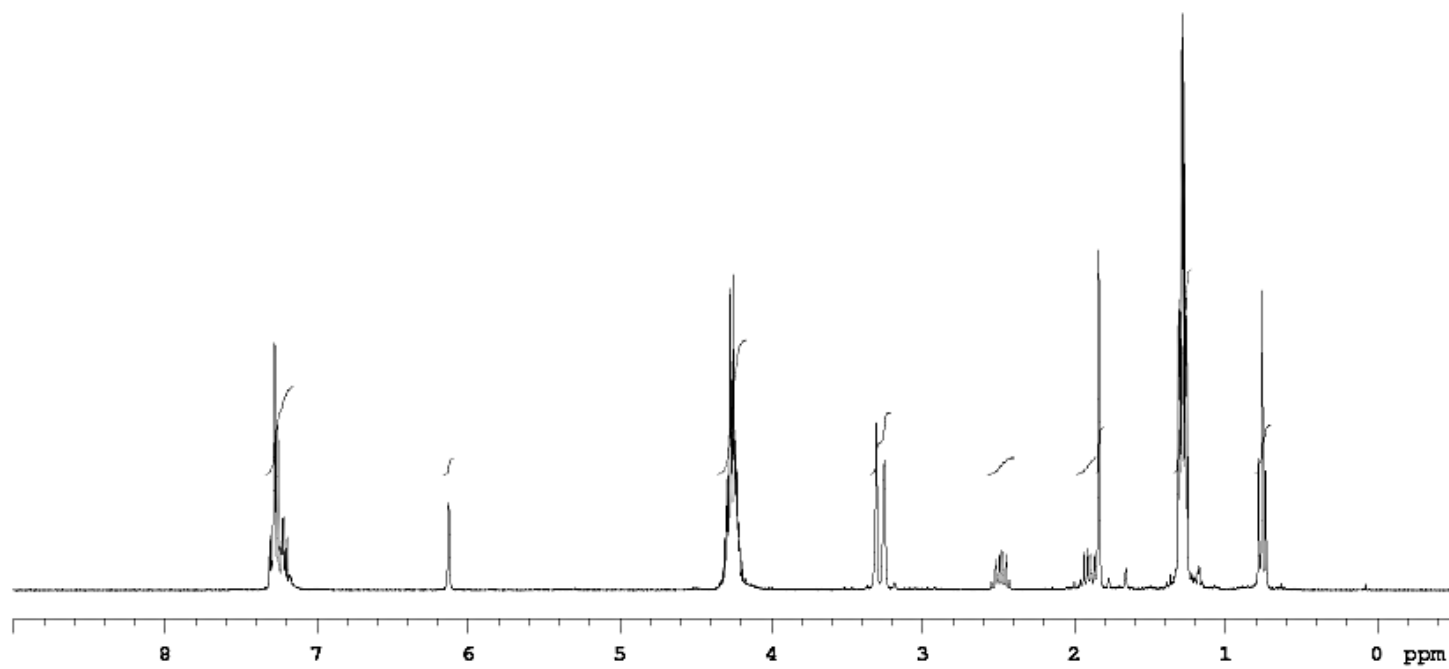

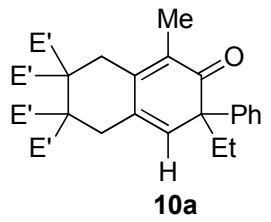

$^{13}\text{C}$  NMR (in  $\text{CDCl}_3$ )

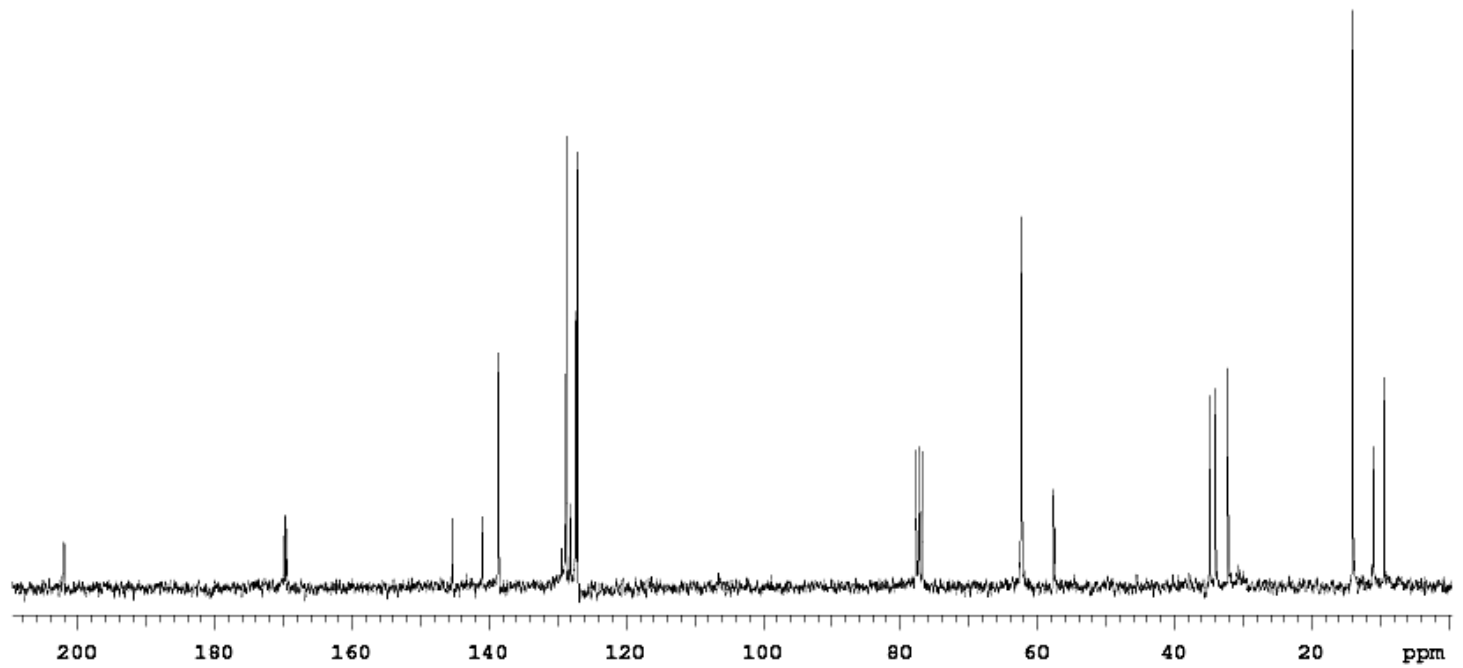

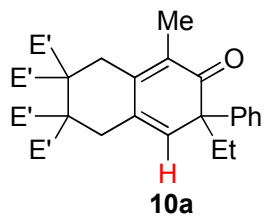

10a  
NOESY-1D

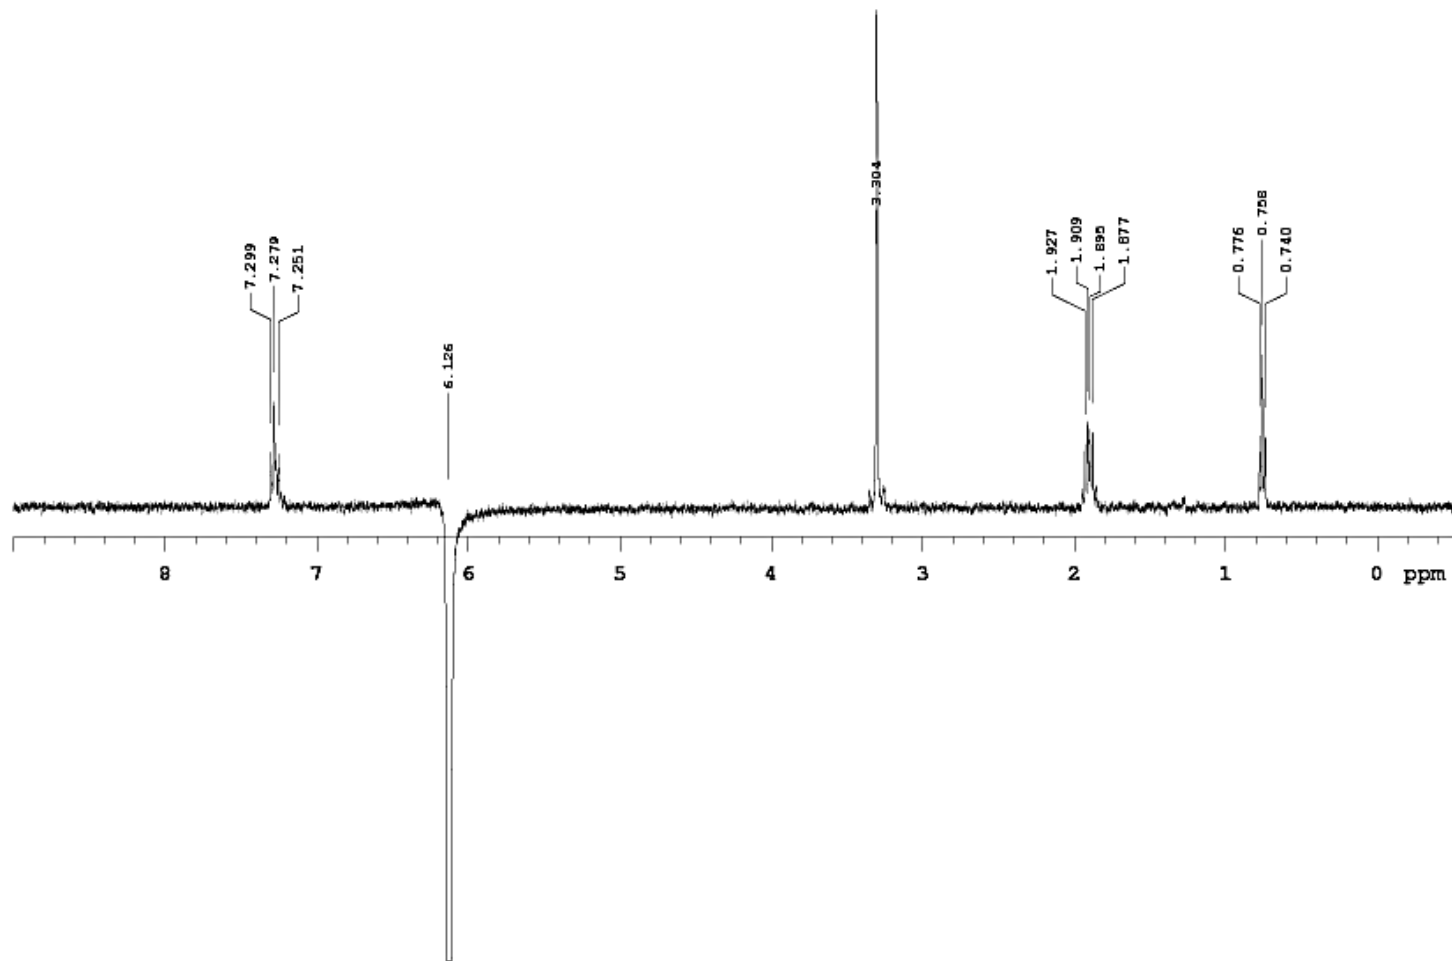

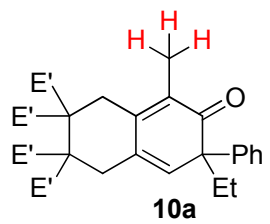

NOESY-1D

EX-V-153-NOESY1D-MeIrr

Pulse Sequence: NOESY1D

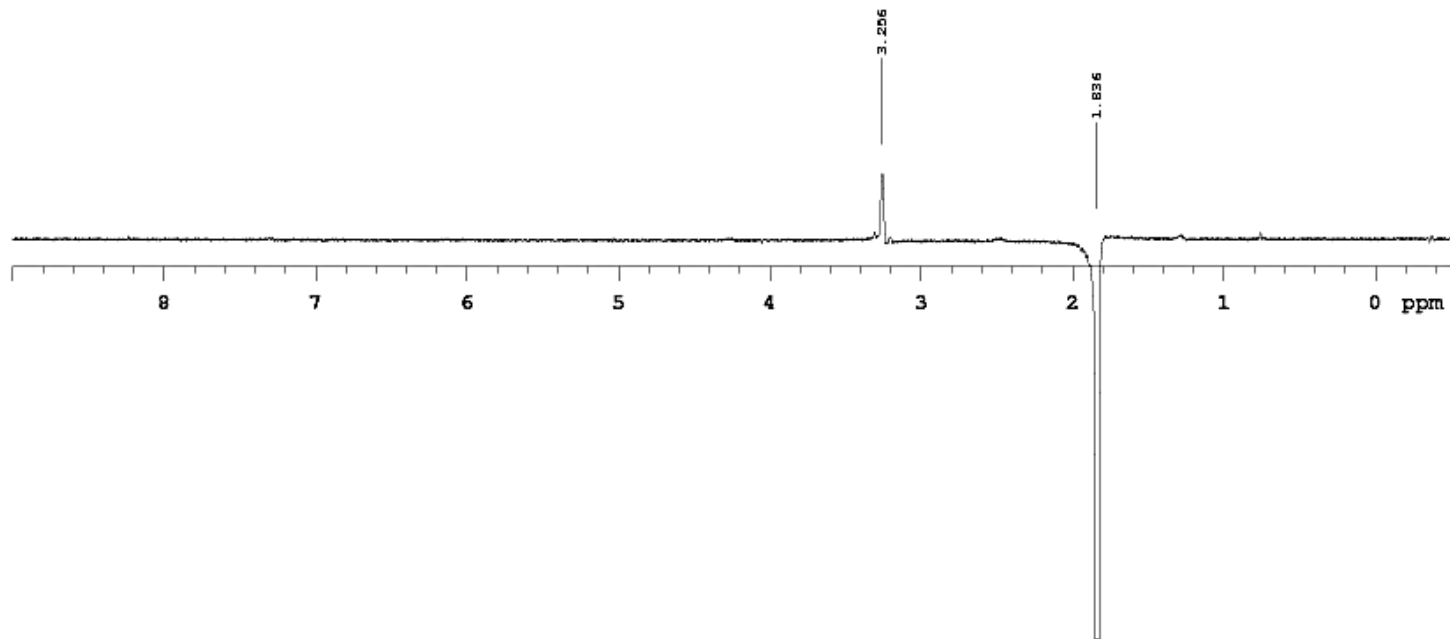

Supplement: NIHMS293198-supplement-2_si_002.pdf [file NIHMS293198-supplement-2_si_002.pdf]
